# Supplementary material for: Hydroxylation mechanism of methane and its derivatives over designed methane monooxygenase model with peroxo dizinc core
Source: Royal Society of Chemistry journal article supplement (doi:10.1039/c2ob25163a), 2012-01-01

## Supplementary Data for

# Hydroxylation Mechanism of Methane and its Derivatives over Designed Methane Monooxygenase Model with Peroxo Dizinc Core

Cai-Qin Li,<sup>a</sup> Hua-Qing Yang,<sup>\*a</sup> Jian Xu<sup>a</sup> and Chang-Wei Hu<sup>\*b</sup>

<sup>a</sup> *College of Chemical Engineering, Sichuan University, Chengdu, Sichuan, 610065, P.R. China*

<sup>b</sup> *Key Laboratory of Green Chemistry and Technology, Ministry of Education, College of Chemistry, Sichuan University, Chengdu, Sichuan, 610064, P.R. China*

*Org. Biomol. Chem.*

\*Correspondence to:

H.-Q. Yang; E-mail: [huaqingyang@scu.edu.cn](mailto:huaqingyang@scu.edu.cn)

Fax: 028-85411105

Telephone: 028-85411105

- i. **Table S1:** Standard orientation of the species in the gas-phase reaction of Q + CH<sub>3</sub>X (X = H, CH<sub>3</sub>, CN, NO<sub>2</sub>, F) calculated at the B3LYP/6-31G(d, p), Lanl2dz level.....P3
- ii. **Table S2:** Vibration frequencies (cm<sup>-1</sup>) scaled by a factor of 0.963 and IR intensities (Debye<sup>2</sup> amu<sup>-1</sup> Å<sup>-2</sup>) of the species in the gas-phase reaction of Q + CH<sub>3</sub>X (X = H, CH<sub>3</sub>, CN, NO<sub>2</sub>, F) calculated at the B3LYP/6-31G(d, p), Lanl2dz level.....P12
- iii. **Table S3:** Zero-point energies (*ZPE*) (hartree), total energies (*E<sub>c</sub>*) (hartree) corrected by *ZPE*, and relative energies (*E<sub>r</sub>*) (kJ mol<sup>-1</sup>) for all the species in the reaction of Q + CH<sub>3</sub>X (X = H, CH<sub>3</sub>, CN, NO<sub>2</sub>, F) calculated at the B3LYP/6-31G(d, p), Lanl2dz level in the gas phase and the B3LYP\*/cc-pVTZ, Lanl2tz level in the protein solution.....P17
- iv. **Figure S1:** Arrhenius plots of rate constants in the reaction of Q + CH<sub>3</sub>X (X = H, CH<sub>3</sub>, CN, NO<sub>2</sub>, F) calculated at the B3LYP\*/cc-pVTZ, Lanl2tz level in the protein solution.....P19

**Table S1:** Standard orientation of the species in the gas-phase reaction of Q + CH<sub>3</sub>X (X = H, CH<sub>3</sub>, CN, NO<sub>2</sub>, F) calculated at the B3LYP/6-31G(d, p), Lanl2dz level

|                        |           |           |           |                            |           |           |           |
|------------------------|-----------|-----------|-----------|----------------------------|-----------|-----------|-----------|
| <b>Q</b>               |           |           |           | N                          | 3.626234  | 3.018528  | 0.155473  |
| O                      | -0.013488 | -0.519776 | -1.267597 | C                          | 4.796967  | 2.308429  | -0.049334 |
| Zn                     | 1.671133  | -0.806510 | -0.245628 | C                          | 4.429371  | 0.990660  | -0.058774 |
| Zn                     | -1.680925 | -0.833909 | -0.225019 | H                          | 1.562716  | 2.367868  | 0.406816  |
| O                      | -0.014346 | 0.362827  | 0.054483  | H                          | 3.541298  | 4.022186  | 0.205387  |
| O                      | 2.166954  | -2.220099 | 1.210410  | H                          | 5.753484  | 2.794129  | -0.156689 |
| C                      | 2.964257  | -2.774910 | 0.392391  | H                          | 5.031969  | 0.106676  | -0.200036 |
| O                      | 3.138290  | -2.347635 | -0.782428 | O                          | -2.213176 | -2.381844 | 0.642864  |
| H                      | 3.524194  | -3.661709 | 0.732614  | C                          | -2.963983 | -2.621182 | -0.354353 |
| N                      | 2.994473  | 0.815860  | -0.497330 | O                          | -3.069477 | -1.830000 | -1.331249 |
| C                      | 2.553782  | 2.058475  | -0.406623 | H                          | -3.544005 | -3.558845 | -0.352880 |
| N                      | 3.569353  | 2.926636  | -0.629004 | N                          | -2.958613 | 1.038395  | -0.038720 |
| C                      | 4.717384  | 2.193395  | -0.876557 | C                          | -4.287333 | 1.174503  | -0.383175 |
| C                      | 4.340233  | 0.881080  | -0.791376 | C                          | -4.705947 | 2.437178  | -0.063949 |
| H                      | 1.524771  | 2.315118  | -0.200046 | N                          | -3.601165 | 3.068065  | 0.482010  |
| H                      | 3.497250  | 3.932534  | -0.621761 | C                          | -2.569172 | 2.191094  | 0.477854  |
| H                      | 5.665941  | 2.662237  | -1.083460 | H                          | -5.658516 | 2.931617  | -0.166454 |
| H                      | 4.923170  | -0.017501 | -0.922810 | H                          | -4.826301 | 0.359462  | -0.841161 |
| O                      | -2.139331 | -2.250150 | 1.243085  | H                          | -1.565751 | 2.386910  | 0.826304  |
| C                      | -2.939665 | -2.817237 | 0.436889  | H                          | -3.567557 | 4.015438  | 0.826349  |
| O                      | -3.132930 | -2.396269 | -0.737416 | H                          | 0.181805  | 1.383009  | 2.789353  |
| H                      | -3.485176 | -3.709566 | 0.785980  | C                          | 0.384111  | 1.843796  | 3.759062  |
| N                      | -3.038200 | 0.761600  | -0.471072 | H                          | 0.421220  | 1.066008  | 4.524383  |
| C                      | -4.384353 | 0.794862  | -0.768663 | H                          | 1.346038  | 2.362005  | 3.727988  |
| C                      | -4.789573 | 2.097857  | -0.867142 | H                          | -0.404859 | 2.558032  | 4.009880  |
| N                      | -3.658046 | 2.858116  | -0.625192 |                            |           |           |           |
| C                      | -2.624515 | 2.014193  | -0.392333 | <b>QCH<sub>4</sub>-TS1</b> |           |           |           |
| H                      | -5.747633 | 2.544118  | -1.080105 | O                          | 0.028983  | -0.568076 | -1.232634 |
| H                      | -4.947378 | -0.117679 | -0.890266 | O                          | -0.010344 | 0.080230  | 0.876724  |
| H                      | -1.601369 | 2.295874  | -0.189757 | Zn                         | 1.657054  | -0.718169 | -0.254611 |
| H                      | -3.607986 | 3.865379  | -0.626277 | Zn                         | -1.642024 | -0.712760 | -0.333912 |
|                        |           |           |           | O                          | 2.407445  | -2.114883 | 1.176110  |
| <b>QCH<sub>4</sub></b> |           |           |           | C                          | 3.266657  | -2.492973 | 0.325179  |
| O                      | 0.147226  | -0.099026 | -0.983384 | O                          | 3.358699  | -1.984739 | -0.828027 |
| O                      | 0.027593  | 0.455709  | 0.500425  | H                          | 3.964943  | -3.299326 | 0.608850  |
| Zn                     | 1.700246  | -0.707891 | 0.118375  | N                          | 2.913839  | 1.020472  | -0.242605 |
| Zn                     | -1.624709 | -0.583046 | -0.229066 | C                          | 2.533860  | 2.241345  | 0.083938  |
| O                      | 2.058555  | -2.289664 | 1.446727  | N                          | 3.556694  | 3.114044  | -0.092365 |
| C                      | 2.873553  | -2.786548 | 0.610649  | C                          | 4.648336  | 2.403293  | -0.559311 |
| O                      | 3.113808  | -2.246044 | -0.505569 | C                          | 4.230291  | 1.103150  | -0.646891 |
| H                      | 3.390088  | -3.723257 | 0.876698  | H                          | 1.549796  | 2.507934  | 0.437530  |
| N                      | 3.067514  | 0.899423  | 0.136924  | H                          | 3.524226  | 4.106962  | 0.081280  |
| C                      | 2.607214  | 2.132597  | 0.259403  | H                          | 5.591225  | 2.877732  | -0.779137 |

|   |           |           |           |
|---|-----------|-----------|-----------|
| H | 4.760391  | 0.218877  | -0.966171 |
| O | -2.483162 | -2.201276 | 0.930280  |
| C | -3.305519 | -2.496878 | 0.011768  |
| O | -3.336203 | -1.899011 | -1.100220 |
| H | -4.026143 | -3.311725 | 0.199357  |
| N | -2.898444 | 1.020416  | -0.188174 |
| C | -4.185224 | 1.166674  | -0.663639 |
| C | -4.628922 | 2.430418  | -0.382741 |
| N | -3.583588 | 3.053465  | 0.276237  |
| C | -2.561701 | 2.167019  | 0.371858  |
| H | -5.562179 | 2.931964  | -0.582664 |
| H | -4.680411 | 0.347114  | -1.161575 |
| H | -1.610499 | 2.366457  | 0.840930  |
| H | -3.582096 | 3.998586  | 0.628085  |
| H | -1.048268 | 0.341901  | 3.368572  |
| C | -0.002239 | 0.357034  | 3.075200  |
| H | -0.016201 | -0.359510 | 1.855402  |
| H | 0.628576  | -0.373248 | 3.581674  |
| H | 0.439659  | 1.342951  | 3.001878  |

#### QH

|    |           |           |           |
|----|-----------|-----------|-----------|
| O  | -0.000162 | 0.145040  | 1.123224  |
| H  | -0.000339 | -0.128780 | 2.048571  |
| O  | 0.000004  | -0.904673 | -1.413219 |
| Zn | 1.495139  | -0.688496 | -0.026644 |
| Zn | -1.495451 | -0.688219 | -0.027081 |
| O  | 2.323119  | -2.229016 | 1.138436  |
| C  | 3.166357  | -2.500455 | 0.225558  |
| O  | 3.218032  | -1.876580 | -0.865697 |
| H  | 3.881322  | -3.320190 | 0.413875  |
| N  | 2.718590  | 1.054970  | -0.097541 |
| C  | 2.429078  | 2.191196  | 0.510686  |
| N  | 3.433735  | 3.083469  | 0.334382  |
| C  | 4.417495  | 2.475958  | -0.426892 |
| C  | 3.956833  | 1.213756  | -0.685402 |
| H  | 1.524962  | 2.368928  | 1.072896  |
| H  | 3.461864  | 4.022368  | 0.701620  |
| H  | 5.327266  | 2.985124  | -0.701753 |
| H  | 4.412274  | 0.400364  | -1.229063 |
| O  | -2.323552 | -2.228544 | 1.138427  |
| C  | -3.167078 | -2.499536 | 0.225713  |
| O  | -3.218691 | -1.875502 | -0.865482 |
| H  | -3.882375 | -3.318975 | 0.414037  |
| N  | -2.717966 | 1.055931  | -0.097780 |
| C  | -3.956136 | 1.215695  | -0.685519 |
| C  | -4.416088 | 2.478029  | -0.426385 |

|   |           |          |           |
|---|-----------|----------|-----------|
| N | -3.431967 | 3.084613 | 0.335164  |
| C | -2.427807 | 2.191689 | 0.511013  |
| H | -5.325589 | 2.987832 | -0.700959 |
| H | -4.412071 | 0.402853 | -1.229587 |
| H | -1.523559 | 2.368566 | 1.073285  |
| H | -3.459581 | 4.023333 | 0.702898  |

#### QCH<sub>4</sub>-TS2

|    |           |           |           |
|----|-----------|-----------|-----------|
| O  | -0.081469 | 0.304262  | -0.873375 |
| O  | 2.369939  | -0.045305 | -0.589056 |
| Zn | 1.162340  | 1.685943  | -0.328888 |
| Zn | 0.740074  | -1.440079 | -0.918839 |
| O  | 2.540434  | 2.883428  | -1.494351 |
| C  | 1.776538  | 3.878226  | -1.325021 |
| O  | 0.714405  | 3.814390  | -0.642766 |
| H  | 2.051707  | 4.840463  | -1.790351 |
| N  | 1.175968  | 2.007362  | 1.805642  |
| C  | 1.200722  | 1.100931  | 2.766582  |
| N  | 1.013716  | 1.689698  | 3.973376  |
| C  | 0.854511  | 3.047924  | 3.766209  |
| C  | 0.956306  | 3.227742  | 2.413823  |
| H  | 1.333350  | 0.038550  | 2.626404  |
| H  | 0.972600  | 1.214511  | 4.862106  |
| H  | 0.684702  | 3.737249  | 4.577599  |
| H  | 0.873232  | 4.125381  | 1.820619  |
| O  | 1.264163  | -2.558147 | -2.639129 |
| C  | 0.230743  | -3.277945 | -2.478526 |
| O  | -0.574203 | -3.119956 | -1.520290 |
| H  | 0.036652  | -4.077987 | -3.213905 |
| N  | 1.377897  | -2.610811 | 0.782500  |
| C  | 0.808144  | -3.761493 | 1.287228  |
| C  | 1.654269  | -4.318852 | 2.207570  |
| N  | 2.756833  | -3.483685 | 2.252332  |
| C  | 2.552494  | -2.470663 | 1.373162  |
| H  | 1.581306  | -5.207651 | 2.813752  |
| H  | -0.149478 | -4.104705 | 0.927131  |
| H  | 3.252420  | -1.675598 | 1.161400  |
| H  | 3.587641  | -3.624703 | 2.806859  |
| H  | 5.113283  | -0.438441 | -0.692959 |
| C  | 4.668160  | 0.395950  | -0.166051 |
| H  | 2.713431  | 0.112356  | -1.482586 |
| H  | 4.566255  | 1.352484  | -0.660946 |
| H  | 4.617016  | 0.367885  | 0.914647  |

#### PCH<sub>3</sub>OH

|   |           |          |           |
|---|-----------|----------|-----------|
| O | -0.541468 | 0.117306 | -0.819830 |
|---|-----------|----------|-----------|

|          |           |           |           |                                      |           |           |           |
|----------|-----------|-----------|-----------|--------------------------------------|-----------|-----------|-----------|
| Zn       | 1.221608  | -0.203255 | -0.270613 | C                                    | -4.777183 | 1.582432  | -1.211696 |
| Zn       | -2.059688 | -0.181577 | 0.171020  | C                                    | -4.428423 | 0.491217  | -0.463371 |
| O        | 2.381879  | -1.968793 | -0.303422 | H                                    | -1.512887 | 1.453261  | -1.414628 |
| C        | 2.936918  | -1.636368 | -1.400093 | H                                    | -3.480432 | 2.913492  | -2.274801 |
| O        | 2.699489  | -0.557912 | -1.996748 | H                                    | -5.732056 | 2.028372  | -1.439902 |
| H        | 3.664959  | -2.345505 | -1.835824 | H                                    | -5.063700 | -0.188071 | 0.084266  |
| N        | 2.518875  | 1.439712  | 0.314685  | O                                    | 2.085315  | 1.755559  | 2.131633  |
| C        | 2.553921  | 2.056204  | 1.482122  | C                                    | 2.207633  | 2.850515  | 1.506294  |
| N        | 3.448732  | 3.075169  | 1.449355  | O                                    | 1.970707  | 2.958489  | 0.267871  |
| C        | 4.016939  | 3.104104  | 0.187776  | H                                    | 2.534160  | 3.743283  | 2.065196  |
| C        | 3.427637  | 2.080341  | -0.503352 | N                                    | 3.058757  | -0.341759 | -0.482124 |
| H        | 1.968972  | 1.777370  | 2.345114  | C                                    | 4.430496  | -0.487245 | -0.462316 |
| H        | 3.666157  | 3.693293  | 2.215895  | C                                    | 4.781239  | -1.577408 | -1.211235 |
| H        | 4.768453  | 3.826738  | -0.087317 | N                                    | 3.590460  | -2.095016 | -1.690143 |
| H        | 3.592367  | 1.732932  | -1.511677 | C                                    | 2.577317  | -1.325136 | -1.229058 |
| O        | -1.860268 | -0.220369 | 2.428656  | H                                    | 5.736983  | -2.021052 | -1.440275 |
| C        | -2.694533 | -1.173335 | 2.361932  | H                                    | 5.064622  | 0.193366  | 0.085000  |
| O        | -3.197379 | -1.564461 | 1.270898  | H                                    | 1.516444  | -1.455307 | -1.411956 |
| H        | -3.000846 | -1.681448 | 3.291266  | H                                    | 3.486814  | -2.910995 | -2.274019 |
| N        | -3.421775 | 1.102934  | -0.881847 |                                      |           |           |           |
| C        | -4.728353 | 1.536941  | -0.976526 |                                      |           |           |           |
| C        | -4.852592 | 2.363846  | -2.059269 | <b>QCH<sub>3</sub>CH<sub>3</sub></b> |           |           |           |
| N        | -3.590317 | 2.423226  | -2.625155 | O                                    | 0.114916  | -0.158433 | -0.976619 |
| C        | -2.755783 | 1.651887  | -1.891174 | Zn                                   | 1.788709  | -0.686342 | -0.027588 |
| H        | -5.694949 | 2.898222  | -2.468729 | Zn                                   | -1.584738 | -0.578400 | -0.034018 |
| H        | -5.482648 | 1.226605  | -0.269545 | N                                    | 3.163971  | 0.913309  | 0.010397  |
| H        | -1.696579 | 1.457912  | -2.054107 | C                                    | 2.782101  | 2.132490  | 0.348571  |
| H        | -3.330759 | 2.941442  | -3.450629 | N                                    | 3.833052  | 2.983629  | 0.274411  |
| H        | -0.060148 | -0.319592 | 2.247880  | C                                    | 4.943554  | 2.263707  | -0.131209 |
| O        | 0.881243  | -0.464852 | 2.019487  | C                                    | 4.508323  | 0.976519  | -0.291438 |
| H        | 1.464876  | -1.517538 | 3.730124  | H                                    | 1.770526  | 2.390058  | 0.625999  |
| C        | 1.319600  | -1.671241 | 2.653003  | H                                    | 3.809125  | 3.969327  | 0.486602  |
| H        | 0.601737  | -2.486211 | 2.502191  | H                                    | 5.909070  | 2.723755  | -0.267398 |
| H        | 2.261422  | -1.959025 | 2.186450  | H                                    | 5.047109  | 0.096198  | -0.606586 |
|          |           |           |           | O                                    | 0.140991  | 0.458105  | 0.490839  |
| <b>P</b> |           |           |           | O                                    | 2.251422  | -2.351452 | 1.146654  |
| O        | 0.000910  | -0.002442 | -0.427052 | C                                    | 3.020115  | -2.771833 | 0.227711  |
| Zn       | -1.464200 | -0.876043 | 0.303434  | O                                    | 3.190885  | -2.144495 | -0.854737 |
| Zn       | 1.463406  | 0.874321  | 0.304731  | H                                    | 3.558293  | -3.719732 | 0.392491  |
| O        | -1.973202 | -2.959906 | 0.266044  | O                                    | -2.115865 | -2.244383 | 1.122004  |
| C        | -2.212716 | -2.851143 | 1.503881  | C                                    | -2.944085 | -2.586014 | 0.222857  |
| O        | -2.091020 | -1.755949 | 2.128983  | O                                    | -3.110437 | -1.917769 | -0.835872 |
| H        | -2.541066 | -3.743396 | 2.062539  | H                                    | -3.537562 | -3.500751 | 0.385308  |
| N        | -3.057030 | 0.342583  | -0.484196 | N                                    | -2.842861 | 1.109868  | 0.076307  |
| C        | -2.573878 | 1.325087  | -1.231159 | C                                    | -4.190804 | 1.279574  | -0.160979 |
| N        | -3.585565 | 2.097445  | -1.691288 | C                                    | -4.508260 | 2.602786  | -0.018924 |
|          |           |           |           | N                                    | -3.321671 | 3.236073  | 0.309353  |

|   |           |          |           |
|---|-----------|----------|-----------|
| C | -2.342487 | 2.301542 | 0.353172  |
| H | -5.439097 | 3.138631 | -0.112779 |
| H | -4.821829 | 0.442377 | -0.416806 |
| H | -1.298650 | 2.476797 | 0.569315  |
| H | -3.201890 | 4.223491 | 0.476047  |
| C | -0.018217 | 1.565236 | 3.747832  |
| H | 0.046108  | 1.064240 | 2.776236  |
| H | -0.994065 | 1.318409 | 4.179035  |
| H | 0.752751  | 1.134971 | 4.395316  |
| C | 0.159780  | 3.079915 | 3.609100  |
| H | 1.138662  | 3.330849 | 3.183326  |
| H | 0.087022  | 3.590587 | 4.575644  |
| H | -0.607580 | 3.514984 | 2.956781  |

**QCH<sub>3</sub>CH<sub>3</sub>-TS1**

|    |           |           |           |
|----|-----------|-----------|-----------|
| O  | -0.003345 | -0.543302 | -1.258485 |
| O  | -0.088209 | 0.296981  | 0.825074  |
| Zn | 1.587746  | -0.550865 | -0.205615 |
| Zn | -1.651997 | -0.657835 | -0.303589 |
| O  | 2.368106  | -1.809810 | 1.342035  |
| C  | 3.261914  | -2.217509 | 0.540145  |
| O  | 3.357257  | -1.800264 | -0.647006 |
| H  | 3.986454  | -2.967571 | 0.902316  |
| N  | 2.804919  | 1.218644  | -0.318967 |
| C  | 2.382937  | 2.446203  | -0.080560 |
| N  | 3.371273  | 3.339752  | -0.334353 |
| C  | 4.483555  | 2.635762  | -0.761071 |
| C  | 4.112887  | 1.318303  | -0.745615 |
| H  | 1.392192  | 2.701153  | 0.263075  |
| H  | 3.303431  | 4.341215  | -0.236728 |
| H  | 5.405846  | 3.126107  | -1.028382 |
| H  | 4.672033  | 0.432408  | -1.005382 |
| O  | -2.434251 | -2.034188 | 1.128012  |
| C  | -3.250221 | -2.454921 | 0.253888  |
| O  | -3.306827 | -1.983755 | -0.916268 |
| H  | -3.942308 | -3.268114 | 0.534679  |
| N  | -2.978100 | 1.031885  | -0.355190 |
| C  | -4.263206 | 1.090639  | -0.852485 |
| C  | -4.738070 | 2.368005  | -0.725717 |
| N  | -3.713005 | 3.089029  | -0.138438 |
| C  | -2.672196 | 2.243833  | 0.067285  |
| H  | -5.680506 | 2.820510  | -0.989516 |
| H  | -4.735145 | 0.206554  | -1.253185 |
| H  | -1.728390 | 2.517154  | 0.513704  |
| H  | -3.735756 | 4.069189  | 0.097609  |
| H  | -0.596047 | 1.567031  | 3.043922  |

|   |           |           |          |
|---|-----------|-----------|----------|
| C | -0.107649 | 0.599506  | 3.118691 |
| H | -0.115427 | 0.000635  | 1.861891 |
| H | -0.761305 | -0.168108 | 3.539598 |
| C | 1.323902  | 0.583034  | 3.566559 |
| H | 1.796624  | -0.382825 | 3.365951 |
| H | 1.909895  | 1.359496  | 3.066650 |
| H | 1.380211  | 0.769155  | 4.651026 |

**QCH<sub>3</sub>CH<sub>3</sub>-TS2**

|    |           |           |           |
|----|-----------|-----------|-----------|
| O  | -0.072363 | 0.296410  | -0.800208 |
| Zn | 1.198307  | 1.659904  | -0.292041 |
| Zn | 0.753730  | -1.440150 | -0.878875 |
| O  | 2.412270  | -0.071442 | -0.537305 |
| H  | 2.733627  | 0.071786  | -1.440917 |
| O  | 2.579081  | 2.835047  | -1.488572 |
| C  | 1.838259  | 3.844377  | -1.303507 |
| O  | 0.791867  | 3.801734  | -0.596437 |
| H  | 2.120544  | 4.800510  | -1.777435 |
| N  | 1.204221  | 1.989206  | 1.848980  |
| C  | 1.143270  | 1.075500  | 2.801941  |
| N  | 0.926685  | 1.663095  | 4.004246  |
| C  | 0.836384  | 3.028544  | 3.802560  |
| C  | 1.009039  | 3.213411  | 2.458029  |
| H  | 1.233742  | 0.009241  | 2.657646  |
| H  | 0.820938  | 1.183237  | 4.885123  |
| H  | 0.657846  | 3.718612  | 4.611470  |
| H  | 0.987520  | 4.117960  | 1.870018  |
| O  | 1.301209  | -2.530094 | -2.612213 |
| C  | 0.266677  | -3.253935 | -2.478386 |
| O  | -0.551421 | -3.115166 | -1.528794 |
| H  | 0.083962  | -4.040534 | -3.231288 |
| N  | 1.357981  | -2.642055 | 0.812645  |
| C  | 0.775957  | -3.795203 | 1.297061  |
| C  | 1.604898  | -4.364053 | 2.225962  |
| N  | 2.709615  | -3.533234 | 2.296635  |
| C  | 2.522828  | -2.511466 | 1.423565  |
| H  | 1.519079  | -5.258201 | 2.822519  |
| H  | -0.176696 | -4.131451 | 0.917746  |
| H  | 3.227275  | -1.715940 | 1.230934  |
| H  | 3.529829  | -3.681478 | 2.864769  |
| H  | 5.149363  | -0.415672 | -0.812533 |
| C  | 4.773133  | 0.463052  | -0.299581 |
| H  | 4.557568  | 1.339758  | -0.899649 |
| C  | 4.992808  | 0.630381  | 1.162523  |
| H  | 5.943458  | 1.152441  | 1.366198  |
| H  | 4.200275  | 1.235393  | 1.616141  |

H 5.046336 -0.327827 1.692129

**PCH<sub>3</sub>CH<sub>2</sub>OH**

O 0.551170 0.123904 1.989436  
H -0.403777 0.336071 2.039610  
H 0.138869 -1.594701 3.091970  
C 0.862239 -0.768906 3.073596  
H 1.834635 -1.202395 2.834214  
C 0.877812 -0.038022 4.409912  
H -0.101598 0.401941 4.627052  
H 1.620567 0.766441 4.404516  
H 1.127990 -0.728839 5.222777  
O -0.570121 -0.294285 -1.004890  
Zn 1.109491 -0.483330 -0.193461  
Zn -2.191238 -0.269443 -0.139998  
O 2.114266 -2.196335 0.529798  
C 2.784423 -2.311555 -0.546577  
O 2.691491 -1.510527 -1.508612  
H 3.481649 -3.166575 -0.621453  
N 2.477989 1.201151 -0.107668  
C 2.458990 2.205782 0.749293  
N 3.428617 3.103638 0.442897  
C 4.103888 2.638892 -0.672264  
C 3.499905 1.455384 -1.000059  
H 1.780828 2.291261 1.584408  
H 3.625704 3.953734 0.948280  
H 4.929104 3.177573 -1.109860  
H 3.722887 0.751584 -1.787158  
O -2.228808 0.428449 2.023188  
C -3.073735 -0.504478 2.173898  
O -3.467783 -1.231121 1.217712  
H -3.490105 -0.691555 3.177556  
N -3.392573 0.625838 -1.681070  
C -4.665518 1.012566 -2.048204  
C -4.645547 1.466634 -3.338501  
N -3.329524 1.346617 -3.751748  
C -2.605050 0.836493 -2.729324  
H -5.420469 1.851057 -3.982317  
H -5.500693 0.936493 -1.368674  
H -1.542161 0.600087 -2.706547  
H -2.966187 1.585168 -4.661901

**QCH<sub>3</sub>CN**

O 0.011681 -0.745370 -1.187723  
Zn 1.759771 -0.926307 -0.267545  
Zn -1.731523 -0.918787 -0.254397

O 0.013344 0.115827 0.150261  
O 2.384056 -2.198020 1.301202  
C 3.155790 -2.776740 0.478203  
O 3.237386 -2.429722 -0.735016  
H 3.779356 -3.611147 0.838543  
N 2.951482 0.785720 -0.562711  
C 2.440818 1.997535 -0.409811  
N 3.393347 2.930792 -0.638000  
C 4.572719 2.280123 -0.954933  
C 4.279247 0.944855 -0.904183  
H 1.416350 2.201527 -0.136150  
H 3.258373 3.928299 -0.570884  
H 5.482246 2.812805 -1.181503  
H 4.913395 0.091266 -1.088567  
O -2.352243 -2.232194 1.276526  
C -3.129974 -2.788783 0.443450  
O -3.218579 -2.411613 -0.759856  
H -3.752149 -3.631236 0.787320  
N -2.965405 0.768669 -0.518792  
C -4.286957 0.860860 -0.906830  
C -4.657204 2.177584 -0.929888  
N -3.531592 2.885488 -0.547525  
C -2.533944 2.002557 -0.310106  
H -5.587543 2.663298 -1.176573  
H -4.860094 -0.023547 -1.139432  
H -1.537623 2.266667 0.011690  
H -3.458260 3.886804 -0.448782  
H -0.781486 0.855523 3.776647  
C 0.084171 0.970379 3.118481  
H 0.996551 0.894644 3.716391  
C 0.032211 2.258877 2.435233  
N -0.010619 3.270653 1.864676  
H 0.076520 0.173915 2.365182

**QCH<sub>3</sub>CN-TS1**

O 0.001377 -0.030509 0.563419  
H 0.000183 0.067312 1.744638  
H -0.910671 0.326327 3.377700  
C -0.001074 0.682319 2.893216  
H 0.910592 0.331263 3.377393  
C -0.004918 2.083083 2.593553  
N -0.008072 3.200996 2.260353  
O 0.001842 -1.166680 -1.236673  
Zn 1.696886 -0.938393 -0.246762  
Zn -1.693507 -0.939327 -0.247348  
O 2.580606 -2.104586 1.291531

|   |           |           |           |
|---|-----------|-----------|-----------|
| C | 3.377047  | -2.587225 | 0.430989  |
| O | 3.353220  | -2.246968 | -0.786145 |
| H | 4.120337  | -3.331213 | 0.762761  |
| N | 2.825029  | 0.835433  | -0.568039 |
| C | 2.449356  | 2.063599  | -0.250041 |
| N | 3.427726  | 2.944200  | -0.567151 |
| C | 4.483247  | 2.239278  | -1.116770 |
| C | 4.091971  | 0.928389  | -1.109503 |
| H | 1.511516  | 2.337287  | 0.209312  |
| H | 3.390002  | 3.940177  | -0.410753 |
| H | 5.386779  | 2.723031  | -1.451360 |
| H | 4.614653  | 0.044184  | -1.440823 |
| O | -2.576327 | -2.103657 | 1.293468  |
| C | -3.371453 | -2.589258 | 0.433469  |
| O | -3.347216 | -2.251655 | -0.784446 |
| H | -4.113936 | -3.333608 | 0.766240  |
| N | -2.825530 | 0.831864  | -0.569591 |
| C | -4.092445 | 0.920059  | -1.112047 |
| C | -4.488745 | 2.229413  | -1.119451 |
| N | -3.436384 | 2.938308  | -0.568933 |
| C | -2.454884 | 2.061458  | -0.251138 |
| H | -5.393870 | 2.709716  | -1.454697 |
| H | -4.611522 | 0.033846  | -1.443678 |
| H | -1.518800 | 2.339044  | 0.209404  |
| H | -3.402656 | 3.934376  | -0.412209 |

#### QCH<sub>3</sub>CN-TS2

|    |           |           |           |
|----|-----------|-----------|-----------|
| O  | -0.004365 | 0.108184  | -0.533055 |
| Zn | 0.970527  | 1.712361  | -0.063319 |
| Zn | 1.015799  | -1.525545 | -0.718477 |
| O  | 2.414988  | 0.132804  | -0.477541 |
| H  | 2.568033  | 0.326201  | -1.419048 |
| O  | 1.970302  | 3.074386  | -1.380411 |
| C  | 0.979018  | 3.859150  | -1.283774 |
| O  | -0.025766 | 3.604693  | -0.562243 |
| H  | 0.999914  | 4.803127  | -1.854572 |
| N  | 1.222517  | 2.315924  | 1.971888  |
| C  | 1.965264  | 1.830863  | 2.955335  |
| N  | 1.767198  | 2.550490  | 4.085071  |
| C  | 0.850971  | 3.548430  | 3.809150  |
| C  | 0.522025  | 3.390349  | 2.491578  |
| H  | 2.653882  | 1.000162  | 2.889579  |
| H  | 2.228335  | 2.388357  | 4.967544  |
| H  | 0.529653  | 4.258181  | 4.554266  |
| H  | -0.145090 | 3.962806  | 1.865570  |
| O  | 2.008742  | -2.235399 | -2.475543 |

|   |          |           |           |
|---|----------|-----------|-----------|
| C | 1.039799 | -3.028254 | -2.677312 |
| O | 0.050313 | -3.110237 | -1.896987 |
| H | 1.067689 | -3.672449 | -3.572633 |
| N | 1.327864 | -2.858815 | 0.922042  |
| C | 0.686097 | -4.083094 | 0.987777  |
| C | 1.051434 | -4.722294 | 2.139832  |
| N | 1.929817 | -3.865514 | 2.777019  |
| C | 2.071177 | -2.756399 | 2.013323  |
| H | 0.777829 | -5.679594 | 2.553256  |
| H | 0.029620 | -4.400017 | 0.191992  |
| H | 2.721558 | -1.932589 | 2.271844  |
| H | 2.404167 | -4.035352 | 3.650996  |
| H | 4.768139 | -0.670504 | -0.804959 |
| C | 4.539641 | 0.129356  | -0.111709 |
| H | 4.698091 | 1.152208  | -0.430002 |
| C | 4.550307 | -0.151616 | 1.256305  |
| N | 4.488230 | -0.389081 | 2.404617  |

#### PCH<sub>2</sub>CNOH

|    |           |           |           |
|----|-----------|-----------|-----------|
| O  | 0.426949  | 0.007429  | 1.972589  |
| H  | -0.535676 | 0.190864  | 2.085067  |
| H  | 0.111014  | -1.328484 | 3.547569  |
| C  | 0.910623  | -0.743602 | 3.077274  |
| H  | 1.667480  | -1.439150 | 2.702251  |
| C  | 1.510982  | 0.147659  | 4.090243  |
| N  | 1.985734  | 0.878276  | 4.857275  |
| O  | -0.647568 | -0.504573 | -1.043282 |
| Zn | 1.032663  | -0.551846 | -0.223727 |
| Zn | -2.280120 | -0.365118 | -0.211173 |
| O  | 2.108419  | -2.173458 | 0.628057  |
| C  | 2.809508  | -2.301302 | -0.428462 |
| O  | 2.686608  | -1.553726 | -1.428848 |
| H  | 3.557855  | -3.113854 | -0.448536 |
| N  | 2.328029  | 1.183182  | -0.089751 |
| C  | 2.320348  | 2.145339  | 0.817229  |
| N  | 3.310672  | 3.035538  | 0.566278  |
| C  | 3.990838  | 2.613514  | -0.561728 |
| C  | 3.367716  | 1.460817  | -0.955662 |
| H  | 1.642449  | 2.209215  | 1.654081  |
| H  | 3.525793  | 3.846161  | 1.126749  |
| H  | 4.833325  | 3.154787  | -0.961406 |
| H  | 3.594041  | 0.792073  | -1.771612 |
| O  | -2.238689 | 0.306697  | 1.992630  |
| C  | -3.155605 | -0.559182 | 2.125472  |
| O  | -3.619851 | -1.213995 | 1.150364  |
| H  | -3.574038 | -0.747344 | 3.127669  |



|   |           |          |           |
|---|-----------|----------|-----------|
| N | -3.398260 | 0.620818 | -1.747636 |
| C | -4.644753 | 1.086640 | -2.114218 |
| C | -4.585522 | 1.578610 | -3.389227 |
| N | -3.273481 | 1.400637 | -3.793635 |
| C | -2.588934 | 0.821223 | -2.781379 |
| H | -5.331395 | 2.023957 | -4.028009 |
| H | -5.490190 | 1.034670 | -1.445256 |
| H | -1.541745 | 0.526654 | -2.759911 |
| H | -2.888017 | 1.647876 | -4.692440 |

#### QCH<sub>3</sub>F

|    |           |           |           |
|----|-----------|-----------|-----------|
| O  | 0.001154  | -0.680036 | -1.085640 |
| Zn | 1.728381  | -0.914581 | -0.132388 |
| Zn | -1.726202 | -0.914959 | -0.132867 |
| O  | 0.000921  | 0.128081  | 0.288753  |
| O  | 2.379260  | -2.307224 | 1.300845  |
| C  | 3.155325  | -2.811772 | 0.432947  |
| O  | 3.233516  | -2.369776 | -0.747857 |
| H  | 3.785165  | -3.667129 | 0.728247  |
| N  | 2.968074  | 0.774656  | -0.381499 |
| C  | 2.545219  | 2.012891  | -0.183981 |
| N  | 3.537405  | 2.888153  | -0.475058 |
| C  | 4.646753  | 2.168983  | -0.883953 |
| C  | 4.274127  | 0.854394  | -0.819703 |
| H  | 1.559274  | 2.286156  | 0.164139  |
| H  | 3.469834  | 3.892223  | -0.407980 |
| H  | 5.568109  | 2.647043  | -1.175379 |
| H  | 4.833307  | -0.037733 | -1.056790 |
| O  | -2.376551 | -2.305592 | 1.302956  |
| C  | -3.150953 | -2.812931 | 0.435272  |
| O  | -3.228583 | -2.373288 | -0.746490 |
| H  | -3.779973 | -3.668567 | 0.731519  |
| N  | -2.968748 | 0.772031  | -0.382906 |
| C  | -4.274687 | 0.848299  | -0.822118 |
| C  | -4.651232 | 2.161818  | -0.885269 |
| N  | -3.544411 | 2.883901  | -0.474695 |
| C  | -2.549914 | 2.011320  | -0.183448 |
| H  | -5.573788 | 2.637399  | -1.176945 |
| H  | -4.830986 | -0.045270 | -1.060573 |
| H  | -1.565256 | 2.287475  | 0.166025  |
| H  | -3.479947 | 3.888100  | -0.406460 |
| H  | -0.896338 | 2.303918  | 3.226181  |
| C  | -0.001669 | 2.133910  | 2.620203  |
| H  | 0.893801  | 2.305166  | 3.224645  |
| H  | -0.001297 | 1.127000  | 2.198533  |
| F  | -0.003230 | 3.062272  | 1.560150  |

#### QCH<sub>3</sub>F-TS1

|    |           |           |           |
|----|-----------|-----------|-----------|
| O  | -0.000155 | -1.067654 | -1.162075 |
| Zn | 1.686359  | -0.905150 | -0.281785 |
| Zn | -1.686684 | -0.905210 | -0.281631 |
| O  | -0.000395 | -0.052811 | 0.756536  |
| O  | 2.640364  | -2.066768 | 1.231620  |
| C  | 3.460182  | -2.480664 | 0.357835  |
| O  | 3.422867  | -2.107407 | -0.848734 |
| H  | 4.240577  | -3.196026 | 0.669521  |
| N  | 2.808397  | 0.913677  | -0.438851 |
| C  | 2.465760  | 2.092132  | 0.051484  |
| N  | 3.415520  | 3.013364  | -0.245495 |
| C  | 4.415838  | 2.384205  | -0.964760 |
| C  | 4.022628  | 1.078270  | -1.073835 |
| H  | 1.575026  | 2.293558  | 0.627604  |
| H  | 3.395990  | 3.986028  | 0.020306  |
| H  | 5.287203  | 2.910550  | -1.319893 |
| H  | 4.514382  | 0.240827  | -1.544706 |
| O  | -2.640934 | -2.066010 | 1.232364  |
| C  | -3.460981 | -2.479883 | 0.358797  |
| O  | -3.423631 | -2.107024 | -0.847902 |
| H  | -4.241622 | -3.194852 | 0.670768  |
| N  | -2.807862 | 0.914153  | -0.439463 |
| C  | -4.022446 | 1.079114  | -1.073659 |
| C  | -4.414400 | 2.385527  | -0.965761 |
| N  | -3.412934 | 3.014613  | -0.248031 |
| C  | -2.463755 | 2.092866  | 0.049221  |
| H  | -5.285576 | 2.912252  | -1.320796 |
| H  | -4.515288 | 0.241588  | -1.543246 |
| H  | -1.572328 | 2.294142  | 0.624324  |
| H  | -3.392275 | 3.987582  | 0.016564  |
| H  | -0.932643 | 0.635110  | 3.311842  |
| C  | -0.002757 | 0.865083  | 2.789902  |
| H  | 0.922720  | 0.632667  | 3.318652  |
| F  | 0.000686  | 2.159830  | 2.345291  |
| H  | 0.000216  | -0.220257 | 1.796967  |

#### PCH<sub>2</sub>FOH

|    |           |           |           |
|----|-----------|-----------|-----------|
| O  | -0.267828 | 0.126839  | 0.695972  |
| Zn | 1.072504  | 1.272529  | 0.176241  |
| Zn | -0.629383 | -1.641554 | 0.261279  |
| O  | 5.266010  | -0.812374 | 0.851126  |
| H  | 4.603036  | -0.189888 | 0.454421  |
| O  | 3.316555  | 0.853863  | 0.018761  |
| C  | 3.227748  | 1.482627  | -1.082721 |

|   |           |           |           |
|---|-----------|-----------|-----------|
| O | 2.143960  | 1.986334  | -1.480513 |
| H | 4.125526  | 1.591380  | -1.711983 |
| N | 0.664237  | 2.903218  | 1.504440  |
| C | -0.384259 | 2.591726  | 2.257219  |
| N | -0.670686 | 3.616050  | 3.092229  |
| C | 0.238197  | 4.634267  | 2.863024  |
| C | 1.060639  | 4.173386  | 1.871805  |
| H | -0.900526 | 1.639685  | 2.166970  |
| H | -1.424467 | 3.629174  | 3.762604  |
| H | 0.214261  | 5.563728  | 3.409070  |
| H | 1.898553  | 4.665644  | 1.402216  |
| O | -1.721295 | -2.677189 | -1.279265 |
| C | -2.467687 | -3.112742 | -0.355320 |
| O | -2.288585 | -2.820526 | 0.864508  |
| H | -3.308477 | -3.776162 | -0.619083 |
| N | 1.186220  | -2.755420 | 0.159900  |
| C | 1.585617  | -3.687143 | -0.779100 |
| C | 2.952350  | -3.783563 | -0.765925 |
| N | 3.380822  | -2.899600 | 0.204214  |
| C | 2.293569  | -2.299699 | 0.729486  |
| H | 3.637333  | -4.383980 | -1.342966 |
| H | 0.863754  | -4.199725 | -1.396428 |
| H | 2.354112  | -1.548388 | 1.499608  |
| H | 4.325104  | -2.585699 | 0.418136  |
| H | 6.230276  | -1.032877 | 2.603481  |
| C | 5.338497  | -0.545739 | 2.197709  |
| H | 5.342449  | 0.530710  | 2.409267  |
| F | 4.231678  | -1.080006 | 2.873360  |

**QCH<sub>3</sub>NO<sub>2</sub>**

|    |           |           |           |
|----|-----------|-----------|-----------|
| O  | 0.028664  | -0.172614 | -0.834382 |
| Zn | 1.761079  | -0.564206 | 0.038527  |
| Zn | -1.712660 | -0.464227 | 0.074934  |
| N  | 3.085993  | 1.071035  | 0.067658  |
| C  | 2.740402  | 2.261656  | 0.531648  |
| N  | 3.782110  | 3.118651  | 0.416203  |
| C  | 4.844666  | 2.439339  | -0.153339 |
| C  | 4.394023  | 1.165074  | -0.363183 |
| H  | 1.776637  | 2.509120  | 0.953812  |
| H  | 3.776081  | 4.086002  | 0.702115  |
| H  | 5.792404  | 2.913550  | -0.351435 |
| H  | 4.901005  | 0.312262  | -0.788026 |
| O  | 0.059236  | 0.489676  | 0.609958  |
| O  | 2.318216  | -2.123517 | 1.345487  |
| C  | 3.063047  | -2.585264 | 0.428480  |
| O  | 3.166447  | -2.034057 | -0.704610 |

|   |           |           |           |
|---|-----------|-----------|-----------|
| H | 3.642228  | -3.500473 | 0.633005  |
| O | -2.292328 | -1.958259 | 1.447073  |
| C | -3.082946 | -2.415744 | 0.567463  |
| O | -3.197201 | -1.894704 | -0.578889 |
| H | -3.693238 | -3.298999 | 0.816906  |
| N | -2.898318 | 1.266316  | -0.000853 |
| C | -4.242006 | 1.437772  | -0.266748 |
| C | -4.560922 | 2.760594  | -0.129127 |
| N | -3.380904 | 3.391533  | 0.222730  |
| C | -2.404749 | 2.458741  | 0.292222  |
| H | -5.488513 | 3.297179  | -0.246729 |
| H | -4.867014 | 0.600785  | -0.537771 |
| H | -1.373986 | 2.652484  | 0.548059  |
| H | -3.266851 | 4.370601  | 0.436373  |
| C | 0.159162  | 0.986713  | 3.576178  |
| H | 0.160889  | 0.344640  | 2.686812  |
| H | -0.448859 | 0.560364  | 4.370462  |
| H | 1.177616  | 1.204028  | 3.893050  |
| N | -0.473495 | 2.269568  | 3.151888  |
| O | 0.236405  | 3.100745  | 2.576894  |
| O | -1.672018 | 2.415491  | 3.361226  |

**QCH<sub>3</sub>NO<sub>2</sub>-TS1**

|    |           |           |           |
|----|-----------|-----------|-----------|
| O  | -0.000039 | -1.267037 | -1.207995 |
| Zn | 1.688666  | -0.991188 | -0.217824 |
| Zn | -1.689057 | -0.991263 | -0.218389 |
| O  | -0.000276 | 0.098500  | 0.416768  |
| O  | 2.433474  | -1.939720 | 1.526138  |
| C  | 3.182364  | -2.648023 | 0.786754  |
| O  | 3.199288  | -2.536390 | -0.471984 |
| H  | 3.844640  | -3.387673 | 1.266414  |
| N  | 2.973242  | 0.583554  | -0.796467 |
| C  | 2.783995  | 1.876557  | -0.586583 |
| N  | 3.836756  | 2.580286  | -1.064122 |
| C  | 4.745826  | 1.689403  | -1.605777 |
| C  | 4.194199  | 0.450581  | -1.429636 |
| H  | 1.940021  | 2.318106  | -0.077905 |
| H  | 3.941162  | 3.582158  | -1.009096 |
| H  | 5.672763  | 2.011715  | -2.051996 |
| H  | 4.575937  | -0.523713 | -1.693672 |
| O  | -2.434399 | -1.941806 | 1.524100  |
| C  | -3.183282 | -2.649122 | 0.783771  |
| O  | -3.200035 | -2.535963 | -0.474807 |
| H  | -3.845701 | -3.389260 | 1.262479  |
| N  | -2.973151 | 0.584276  | -0.795768 |
| C  | -4.194396 | 0.452395  | -1.428605 |

|   |           |           |           |
|---|-----------|-----------|-----------|
| C | -4.745388 | 1.691640  | -1.603751 |
| N | -3.835629 | 2.581660  | -1.061837 |
| C | -2.783094 | 1.877039  | -0.585122 |
| H | -5.672293 | 2.014763  | -2.049450 |
| H | -4.576745 | -0.521515 | -1.693167 |
| H | -1.938665 | 2.317747  | -0.076479 |
| H | -3.939443 | 3.583553  | -1.006131 |
| H | -0.931099 | 0.787687  | 3.146745  |
| C | 0.000101  | 1.030818  | 2.644297  |
| H | 0.931104  | 0.787078  | 3.146826  |
| H | 0.000018  | 0.258246  | 1.559601  |
| N | 0.000547  | 2.393533  | 2.153628  |
| O | -1.091234 | 2.933109  | 1.935374  |
| O | 1.092684  | 2.932277  | 1.935167  |

#### QCH<sub>3</sub>NO<sub>2</sub>-TS2

|    |           |           |           |
|----|-----------|-----------|-----------|
| O  | 0.276806  | -1.093308 | 0.784012  |
| H  | 0.010122  | -2.070608 | 0.844603  |
| H  | -0.894822 | -1.683096 | 2.845194  |
| C  | -0.368385 | -0.748568 | 2.954519  |
| H  | 0.492789  | -0.626340 | 3.593505  |
| N  | -0.973453 | 0.374368  | 2.547592  |
| O  | -2.023462 | 0.279696  | 1.768643  |
| O  | -0.526551 | 1.520997  | 2.827624  |
| O  | 0.042318  | -0.939766 | -1.078177 |
| Zn | 1.912920  | -0.620600 | -0.617702 |
| Zn | -1.697847 | -0.648214 | -0.097913 |
| O  | 3.406788  | -2.077680 | -0.412369 |
| C  | 3.921626  | -1.681348 | -1.501418 |
| O  | 3.439899  | -0.722380 | -2.170654 |
| H  | 4.824101  | -2.193955 | -1.871879 |
| N  | 2.508813  | 1.265628  | 0.102324  |
| C  | 2.016172  | 1.986725  | 1.100688  |
| N  | 2.726113  | 3.131438  | 1.228860  |
| C  | 3.720837  | 3.143674  | 0.268214  |
| C  | 3.572300  | 1.975946  | -0.426274 |
| H  | 1.165127  | 1.739321  | 1.728090  |
| H  | 2.548835  | 3.845976  | 1.918778  |
| H  | 4.421110  | 3.957620  | 0.172084  |
| H  | 4.135255  | 1.584213  | -1.259600 |
| O  | -0.942866 | -3.407020 | 0.960377  |
| C  | -2.065207 | -3.395300 | 0.415692  |
| O  | -2.671448 | -2.392821 | -0.102873 |
| H  | -2.627986 | -4.346407 | 0.368160  |
| N  | -2.797743 | 0.911117  | -1.019656 |
| C  | -3.274371 | 1.085717  | -2.304138 |

|   |           |          |           |
|---|-----------|----------|-----------|
| C | -3.923541 | 2.286505 | -2.385767 |
| N | -3.831236 | 2.843075 | -1.123120 |
| C | -3.147956 | 1.986976 | -0.329145 |
| H | -4.428646 | 2.781335 | -3.199548 |
| H | -3.118836 | 0.342873 | -3.071425 |
| H | -2.914557 | 2.139591 | 0.715079  |
| H | -4.212857 | 3.730811 | -0.833482 |

#### PCH<sub>2</sub>NO<sub>2</sub>OH

|    |           |           |           |
|----|-----------|-----------|-----------|
| O  | 0.384068  | 0.022401  | 1.957664  |
| H  | -0.575564 | 0.238215  | 2.047592  |
| H  | 0.073710  | -1.238135 | 3.583237  |
| C  | 0.838750  | -0.657941 | 3.059660  |
| H  | 1.679859  | -1.296346 | 2.783886  |
| N  | 1.384664  | 0.295488  | 4.141890  |
| O  | 1.744599  | -0.249359 | 5.177114  |
| O  | 1.434675  | 1.497736  | 3.906029  |
| O  | -0.597469 | -0.400680 | -1.110557 |
| Zn | 1.079641  | -0.557687 | -0.306038 |
| Zn | -2.229200 | -0.345109 | -0.266689 |
| O  | 2.050831  | -2.173596 | 0.700050  |
| C  | 2.768802  | -2.383314 | -0.329665 |
| O  | 2.685902  | -1.689877 | -1.374986 |
| H  | 3.494675  | -3.214763 | -0.291130 |
| N  | 2.413397  | 1.126386  | -0.116700 |
| C  | 2.422059  | 2.072033  | 0.809273  |
| N  | 3.415684  | 2.958749  | 0.558561  |
| C  | 4.077805  | 2.554973  | -0.586708 |
| C  | 3.442650  | 1.413298  | -0.992263 |
| H  | 1.767294  | 2.116971  | 1.667550  |
| H  | 3.641566  | 3.758325  | 1.130498  |
| H  | 4.916678  | 3.099525  | -0.989481 |
| H  | 3.654357  | 0.762614  | -1.826670 |
| O  | -2.274202 | 0.295264  | 1.922467  |
| C  | -3.136423 | -0.630264 | 2.041522  |
| O  | -3.533692 | -1.316970 | 1.060828  |
| H  | -3.561659 | -0.839085 | 3.036517  |
| N  | -3.393384 | 0.638950  | -1.767008 |
| C  | -4.657589 | 1.078983  | -2.103508 |
| C  | -4.632010 | 1.600948  | -3.367636 |
| N  | -3.322374 | 1.467901  | -3.796201 |
| C  | -2.606468 | 0.884778  | -2.808092 |
| H  | -5.399689 | 2.040198  | -3.984391 |
| H  | -5.490429 | 0.989385  | -1.422865 |
| H  | -1.550641 | 0.623537  | -2.809276 |
| H  | -2.957935 | 1.747383  | -4.694324 |

**Table S2:** Vibration frequencies ( $\text{cm}^{-1}$ ) scaled by a factor of 0.963 and IR intensities ( $\text{Debye}^2 \text{amu}^{-1} \text{\AA}^{-2}$ ) of the species in the gas-phase reaction of  $\text{Q} + \text{CH}_3\text{X}$  ( $\text{X} = \text{H}, \text{CH}_3, \text{CN}, \text{NO}_2, \text{F}$ ) calculated at the B3LYP/6-31G(d, p), Lanl2dz level

### Q

10/0.4, 25/0.8, 35/5.4, 38/1.1, 41/0.0, 50/0.0, 56/0.9, 63/10.0, 63/0.7, 68/0.1, 70/0.9, 117/11.6, 128/5.4, 132/0.1, 140/12.0, 165/8.7, 167/11.3, 187/0.1, 190/5.9, 211/10.9, 217/9.7, 252/19.9, 285/9.5, 312/53.8, 317/3.1, 325/84.9, 353/49.5, 375/93.0, 507/250.8, 545/10.5, 547/167.6, 624/3.0, 624/41.5, 656/0.5, 658/1.1, 715/5.0, 716/61.7, 754/0.9, 795/14.3, 796/64.6, 838/4.2, 845/42.0, 854/0.2, 855/1.3, 899/2.6, 899/23.0, 918/6.6, 919/9.2, 1026/0.4, 1026/0.2, 1033/54.1, 1038/124.4, 1068/24.8, 1069/4.8, 1110/12.3, 1114/13.7, 1153/11.0, 1154/1.6, 1233/8.1, 1234/4.5, 1294/19.5, 1294/50.7, 1335/3.8, 1335/17.4, 1347/53.7, 1348/144.5, 1407/34.0, 1407/4.3, 1474/13.0, 1474/52.0, 1529/21.1, 1530/17.3, 1585/166.4, 1593/554.6, 2923/57.1, 2924/180.3, 3167/47.4, 3169/1.7, 3170/2.4, 3170/14.3, 3188/1.0, 3188/1.5, 3541/1.3, 3541/157.7

### QCH<sub>4</sub>

5/0.5, 14/0.6, 15/0.3, 24/0.8, 29/0.1, 33/2.0, 37/3.8, 40/0.1, 48/0.4, 55/0.4, 59/0.4, 61/1.4, 63/9.7, 65/0.7, 70/0.4, 84/0.4, 111/0.8, 116/10.7, 128/2.7, 132/0.6, 138/16.2, 164/7.9, 168/11.2, 187/0.9, 190/4.0, 211/11.1, 217/8.7, 244/26.7, 283/8.9, 312/48.0, 318/2.8, 325/81.5, 342/56.1, 376/92.9, 503/241.2, 546/14.5, 549/160.6, 624/14.1, 624/31.2, 657/0.3, 658/1.2, 715/30.8, 717/35.0, 755/0.9, 795/29.2, 796/49.6, 838/16.0, 845/23.7, 856/9.9, 857/1.8, 899/6.4, 900/17.0, 918/6.9, 919/8.8, 1025/0.3, 1026/0.3, 1035/55.4, 1039/117.4, 1069/24.2, 1070/3.8, 1111/11.7, 1114/12.5, 1153/8.6, 1154/3.4, 1233/6.3, 1237/6.9, 1293/31.1, 1294/40.5, 1297/11.6, 1305/9.1, 1317/17.2, 1334/8.8, 1335/12.8, 1347/72.1, 1348/126.1, 1407/34.2, 1408/4.4, 1474/20.3, 1475/43.5, 1519/0.5, 1522/0.9, 1529/20.1, 1530/18.0, 1584/171.7, 1591/550.3, 2924/106.6, 2927/99.1, 2927/33.7, 3030/38.1, 3041/13.5, 3048/12.2, 3166/41.5, 3169/5.0, 3170/2.7, 3173/19.2, 3188/0.9, 3188/1.6, 3540/67.1, 3542/90.7

### QCH<sub>4</sub>-TS1

i781/289.5, 9/0.1, 19/0.7, 29/3.5, 34/2.4, 44/0.8, 46/1.4, 49/0.8, 50/0.1, 58/0.6, 65/0.1, 69/2.3, 78/4.0, 85/0.3, 90/0.1, 121/6.8, 124/5.5, 132/15.3, 134/0.5, 163/8.7, 165/8.1, 178/0.6, 185/1.7, 198/5.6, 204/23.4, 208/26.7, 236/1.2, 293/45.8, 295/20.8, 302/10.9, 313/95.0, 316/91.1, 426/27.7, 484/45.6, 535/34.3, 538/134.8, 588/8.6, 619/210.2, 624/9.6, 624/21.9, 655/0.1, 657/1.2, 715/8.2, 716/45.0, 723/32.6, 788/23.5, 789/56.6, 799/7.8, 807/23.9, 867/8.3, 871/8.2, 876/88.3, 895/4.2, 896/24.4, 918/5.1, 919/5.4, 1027/0.3, 1027/0.3, 1038/46.1, 1041/100.1, 1057/31.5, 1069/25.9, 1070/13.7, 1112/7.3, 1114/11.6, 1149/12.3, 1149/2.1, 1233/2.2, 1236/0.8, 1300/18.2, 1300/44.7, 1332/4.5, 1333/17.7, 1349/85.1, 1350/122.6, 1387/5.6, 1403/2.3, 1406/22.5, 1407/5.5, 1476/27.1, 1477/46.6, 1530/15.2, 1531/21.8, 1591/141.2, 1596/495.4, 2302/26.2, 2907/117.5, 2908/166.8, 2984/0.7, 3118/4.4, 3152/10.1, 3169/5.7, 3170/6.5, 3177/7.8, 3179/2.6, 3188/2.2, 3188/3.0, 3540/7.3, 3540/141.9

### QH

10/0.1, 18/0.3, 36/5.8, 42/0.4, 46/0.8, 47/0.6, 53/0.5, 61/0.6, 68/7.2, 78/0.2, 85/0.4, 98/5.6, 116/1.7, 131/0.8, 136/9.3, 142/2.8, 155/5.5, 174/6.5, 177/15.0, 189/7.4, 201/9.6, 223/12.3, 304/50.9, 305/8.6, 309/68.4, 320/20.7, 340/7.1, 367/125.9, 395/181.3, 421/29.8, 523/76.6, 540/35.1, 544/134.3, 624/8.5, 625/39.0, 655/0.9, 658/2.3, 700/155.4, 717/5.5, 718/51.9, 787/28.2, 788/56.3, 812/14.5, 822/33.1, 865/0.8, 865/17.7, 896/4.1, 896/25.5, 918/4.7, 919/5.8, 1026/0.7, 1027/0.5, 1034/46.2, 1039/112.2, 1069/25.8, 1070/13.1, 1109/8.8, 1113/12.6, 1150/12.0, 1150/2.9, 1231/3.4, 1232/1.0, 1299/25.9, 1299/49.6, 1333/1.6, 1333/18.8, 1347/90.5, 1348/114.3, 1406/21.6, 1407/6.3, 1475/21.5, 1476/54.1, 1529/13.8, 1530/25.8, 1593/132.9, 1601/597.5, 2906/110.8, 2907/172.3, 3171/0.5, 3171/12.0, 3176/15.5, 3178/4.5, 3189/0.5, 3189/6.4, 3539/2.5, 3540/154.1, 3717/19.0

### QCH<sub>4</sub>-TS2

i280/161.8, 13/0.8, 23/0.7, 27/1.0, 31/0.2, 41/6.5, 49/0.4, 51/0.0, 57/0.2, 62/0.1, 66/3.1, 72/0.8, 87/1.9, 90/1.5, 102/2.6, 106/0.1, 115/1.0, 134/1.8, 142/14.0, 147/3.3, 157/6.9, 170/8.1, 183/2.2, 190/5.7, 196/6.1, 206/34.0, 226/6.8, 289/59.2, 300/8.0, 305/6.8, 311/121.8, 317/61.1, 380/1.2, 430/0.9, 449/13.2, 539/83.2, 545/55.2, 552/167.7, 624/16.6, 625/27.0, 655/1.6, 659/1.6, 663/73.9,

682/107.4, 716/28.9, 717/4.6, 720/51.4, 786/45.4, 788/42.5, 796/14.0, 831/25.2, 853/7.2, 871/7.3, 896/11.8, 896/11.3, 916/5.7, 918/3.7, 1026/0.2, 1028/0.1, 1040/62.8, 1046/80.5, 1069/17.3, 1074/18.8, 1113/6.3, 1118/12.6, 1147/8.9, 1148/2.8, 1236/4.2, 1243/0.5, 1299/29.9, 1301/34.8, 1329/16.1, 1331/5.1, 1348/118.4, 1351/100.3, 1369/4.6, 1388/3.2, 1405/13.8, 1408/14.6, 1472/31.2, 1480/37.6, 1526/10.4, 1531/22.0, 1592/101.8, 1595/517.0, 2906/166.1, 2909/134.7, 3016/5.7, 3168/6.0, 3170/22.1, 3170/9.9, 3171/9.8, 3182/8.8, 3188/2.4, 3189/3.0, 3194/1.4, 3537/69.8, 3539/79.7, 3662/50.8

### **PCH<sub>3</sub>OH**

14/2.7, 19/1.2, 39/3.3, 41/3.0, 50/0.3, 53/0.4, 61/0.6, 63/0.8, 76/0.3, 78/3.8, 88/3.8, 99/2.6, 106/1.4, 110/2.7, 116/15.3, 129/3.2, 135/6.8, 142/4.0, 146/7.0, 153/1.8, 164/17.5, 172/21.7, 175/8.4, 185/7.3, 196/11.9, 202/26.3, 249/12.9, 295/47.1, 302/63.2, 304/47.9, 319/45.9, 447/105.0, 534/89.4, 556/79.2, 624/26.0, 625/25.9, 657/4.2, 661/0.5, 709/36.9, 712/29.4, 719/164.2, 735/272.7, 782/32.7, 783/45.9, 818/19.9, 829/8.5, 863/10.5, 895/13.8, 899/23.8, 907/10.4, 910/9.7, 916/3.0, 1017/132.3, 1026/0.4, 1028/0.3, 1032/103.9, 1042/72.4, 1069/8.7, 1070/19.7, 1098/26.1, 1114/27.3, 1116/13.2, 1140/1.0, 1146/4.5, 1148/4.8, 1235/2.1, 1241/25.4, 1300/47.0, 1305/44.9, 1328/10.2, 1330/9.7, 1348/156.0, 1349/65.4, 1394/19.6, 1407/26.3, 1407/14.9, 1437/4.8, 1452/7.9, 1461/20.0, 1467/4.5, 1473/37.0, 1523/12.0, 1528/18.8, 1585/434.6, 1607/370.2, 2883/181.6, 2911/60.7, 2924/128.2, 2971/45.6, 3055/8.6, 3067/159.5, 3162/2.4, 3170/5.1, 3178/8.7, 3184/1.2, 3188/5.7, 3436/621.9, 3540/76.1, 3540/78.7

### **P**

7/4.2, 13/3.7, 27/0.0, 40/0.1, 44/0.4, 45/0.8, 46/0.3, 54/0.2, 56/0.4, 76/0.6, 79/9.0, 112/0.0, 123/8.8, 137/14.4, 150/53.1, 168/2.0, 191/17.0, 193/9.0, 200/34.3, 210/3.8, 211/1.5, 290/1.9, 315/97.8, 317/10.3, 318/143.7, 421/48.7, 555/49.6, 556/112.0, 624/17.3, 624/36.3, 660/0.1, 660/0.2, 711/34.7, 711/42.2, 741/310.4, 795/40.7, 796/28.3, 830/7.6, 830/9.5, 880/7.7, 880/14.9, 898/27.2, 899/9.6, 912/12.8, 912/2.2, 1025/0.5, 1025/0.0, 1031/161.9, 1035/46.4, 1071/20.4, 1072/0.1, 1112/30.3, 1114/5.2, 1150/11.3, 1150/0.1, 1236/26.6, 1237/4.2, 1294/23.5, 1294/44.6, 1332/16.2, 1332/4.4, 1347/151.8, 1348/50.0, 1407/45.0, 1407/1.9, 1466/36.8, 1466/12.2, 1524/3.2, 1524/27.7, 1585/206.8, 1588/465.2, 2921/186.8, 2922/64.9, 3123/156.6, 3124/12.4, 3163/2.5, 3163/2.1, 3185/1.5, 3185/0.5, 3539/98.5, 3539/65.1

### **QCH<sub>3</sub>CH<sub>3</sub>**

5/0.5, 10/1.0, 15/0.4, 18/0.0, 24/0.8, 33/3.4, 33/1.8, 40/0.3, 48/0.2, 50/0.5, 55/1.0, 62/4.1, 63/5.5, 66/0.7, 69/1.1, 79/0.2, 93/0.1, 116/11.6, 129/4.9, 132/0.2, 141/14.0, 164/8.0, 167/11.7, 188/0.0, 192/4.1, 212/9.8, 217/9.3, 243/27.2, 281/10.8, 312/39.0, 313/10.6, 317/3.1, 325/85.8, 346/50.6, 373/90.1, 508/239.6, 543/11.6, 547/167.7, 623/7.4, 624/36.0, 656/0.2, 658/2.0, 716/19.4, 717/44.4, 748/0.9, 795/16.9, 796/63.5, 797/4.1, 800/9.8, 837/6.4, 846/42.9, 853/2.3, 855/0.2, 899/2.0, 899/21.2, 918/6.1, 919/8.8, 966/0.1, 1026/0.4, 1026/0.2, 1034/49.4, 1038/116.1, 1069/26.7, 1070/4.7, 1110/8.7, 1114/10.5, 1153/11.3, 1154/1.7, 1179/0.5, 1183/0.0, 1233/7.5, 1235/4.1, 1294/18.7, 1294/51.4, 1335/6.1, 1335/15.0, 1347/55.9, 1348/145.6, 1365/0.2, 1389/0.5, 1407/32.5, 1407/5.8, 1458/0.4, 1462/0.8, 1462/5.4, 1470/9.7, 1474/15.5, 1475/48.3, 1529/22.7, 1529/16.4, 1584/163.6, 1591/555.6, 2919/32.2, 2925/66.8, 2926/167.1, 2934/21.3, 2970/28.6, 2981/25.0, 3005/62.2, 3009/35.0, 3169/5.7, 3169/4.7, 3170/41.6, 3173/9.8, 3188/1.3, 3188/1.2, 3541/22.8, 3541/132.0

### **QCH<sub>3</sub>CH<sub>3</sub>-TS1**

i581/423.0, 14/0.0, 21/0.6, 31/0.9, 31/5.3, 39/0.5, 45/1.2, 51/0.3, 57/0.8, 60/0.7, 63/2.1, 69/2.6, 78/3.6, 84/0.3, 89/0.1, 120/6.7, 124/11.5, 130/4.9, 133/4.9, 148/5.8, 152/2.6, 165/9.5, 174/0.7, 182/3.0, 196/5.8, 199/18.9, 203/22.7, 232/7.5, 248/4.1, 288/43.8, 293/37.1, 307/38.3, 315/96.9, 372/75.2, 437/47.4, 535/26.4, 537/139.2, 602/183.1, 624/6.5, 624/20.3, 630/34.6, 656/0.4, 658/1.0, 667/9.0, 715/6.7, 716/49.9, 727/61.8, 787/25.4, 787/55.9, 803/8.3, 812/26.0, 832/8.0, 867/8.3, 869/8.1, 895/5.9, 896/21.3, 917/3.7, 918/5.7, 927/55.8, 1024/19.8, 1026/0.3, 1027/0.4, 1037/48.3, 1041/101.0, 1068/28.5, 1069/9.6, 1080/114.8, 1111/7.7, 1115/11.9, 1149/11.9, 1149/2.4, 1184/2.0, 1232/2.6, 1235/1.2, 1300/28.8, 1301/37.1, 1333/7.0, 1334/14.2, 1349/89.9, 1350/121.1, 1363/3.9, 1406/22.3, 1406/6.0, 1429/2.0, 1432/7.0, 1453/14.3, 1475/25.9, 1476/45.7, 1529/15.1, 1530/20.4, 1591/162.3, 1597/485.6, 2155/215.4, 2890/26.5, 2903/141.7, 2906/150.8, 2979/7.9, 2997/11.6, 3020/9.2, 3096/16.0, 3169/5.7, 3170/5.3, 3177/9.0, 3179/3.0, 3188/1.9, 3188/3.5, 3540/43.7, 3541/102.2

### QCH<sub>3</sub>CH<sub>3</sub>-TS2

i214/16.6, 9/1.0, 21/0.7, 28/0.1, 35/3.8, 47/5.0, 49/0.5, 54/1.1, 61/0.7, 63/1.8, 68/0.7, 74/0.7, 85/1.0, 91/0.7, 95/2.0, 108/4.6, 117/0.2, 130/3.8, 133/5.9, 145/14.5, 158/8.2, 167/8.9, 175/1.5, 180/3.7, 190/3.3, 194/20.1, 198/19.9, 227/21.0, 249/1.8, 287/41.6, 298/11.7, 305/35.1, 309/131.9, 324/42.1, 464/45.3, 534/9.8, 537/81.5, 540/57.4, 554/132.4, 623/17.5, 624/14.5, 627/176.9, 655/0.7, 659/5.6, 715/31.3, 716/8.3, 718/32.5, 784/44.2, 786/48.8, 794/1.8, 795/19.9, 816/19.2, 819/15.4, 855/9.3, 868/6.7, 895/16.1, 895/5.3, 916/4.4, 917/3.2, 965/89.1, 1024/0.2, 1026/0.1, 1039/57.6, 1042/5.8, 1045/75.7, 1069/17.5, 1073/19.0, 1112/5.7, 1117/12.3, 1146/7.2, 1147/4.3, 1175/5.4, 1235/3.0, 1241/0.5, 1300/29.6, 1301/35.5, 1328/15.6, 1330/4.4, 1347/119.0, 1349/20.3, 1352/105.2, 1405/12.7, 1408/14.2, 1423/3.1, 1433/24.2, 1454/1.2, 1471/34.6, 1478/38.2, 1526/10.1, 1529/20.2, 1593/113.3, 1597/525.9, 2874/24.8, 2901/186.4, 2905/147.7, 2953/19.3, 2999/14.7, 3059/16.7, 3168/7.4, 3169/1.2, 3171/3.3, 3171/8.6, 3176/16.7, 3188/2.9, 3188/3.4, 3536/61.2, 3538/76.5, 3672/34.5

### PCH<sub>3</sub>CH<sub>2</sub>OH

15/3.3, 16/0.1, 26/0.3, 37/2.0, 41/4.3, 49/0.9, 54/0.4, 59/0.5, 62/0.9, 70/0.4, 76/0.9, 83/6.8, 99/1.3, 103/7.8, 108/0.8, 120/3.2, 122/7.7, 132/3.9, 136/8.7, 146/1.9, 155/20.9, 168/25.4, 175/7.3, 184/6.4, 194/11.6, 202/28.8, 213/6.0, 279/1.0, 296/56.0, 302/58.0, 304/46.0, 319/42.1, 426/20.7, 447/101.9, 534/89.0, 556/79.0, 623/26.1, 625/25.6, 657/4.3, 660/0.5, 708/37.3, 712/28.3, 719/170.3, 734/257.3, 773/7.9, 782/31.8, 783/45.2, 821/20.5, 828/8.4, 860/15.3, 863/12.3, 895/13.5, 899/24.2, 906/10.2, 910/9.4, 916/3.1, 1026/1.2, 1027/138.2, 1028/1.7, 1032/84.9, 1041/74.9, 1069/3.4, 1070/17.5, 1073/54.6, 1103/5.5, 1114/25.2, 1115/15.5, 1146/4.6, 1148/4.5, 1235/1.7, 1241/27.1, 1254/19.3, 1301/47.1, 1305/43.7, 1328/10.3, 1331/9.7, 1346/74.6, 1348/88.4, 1350/52.0, 1375/17.2, 1404/31.3, 1407/25.3, 1407/13.4, 1450/3.1, 1453/1.8, 1461/19.8, 1473/36.7, 1474/4.0, 1523/12.0, 1528/18.5, 1585/442.5, 1606/383.4, 2883/181.1, 2924/87.8, 2926/50.2, 2930/22.4, 2997/14.2, 3003/36.4, 3030/27.5, 3067/163.1, 3162/2.4, 3170/5.3, 3179/9.2, 3184/1.2, 3188/6.1, 3442/565.4, 3540/84.8, 3540/69.2

### QCH<sub>3</sub>CN

14/0.0, 19/1.6, 22/0.6, 27/0.3, 34/1.5, 36/1.2, 38/1.6, 46/8.1, 52/3.6, 58/0.2, 63/8.5, 68/3.1, 70/2.7, 76/2.4, 87/6.1, 102/13.3, 117/14.3, 131/0.2, 132/6.4, 142/0.6, 145/19.6, 160/9.6, 166/8.7, 192/0.2, 195/2.4, 213/12.7, 214/7.4, 239/19.6, 266/15.8, 310/35.9, 316/23.8, 325/97.1, 355/51.8, 364/71.4, 385/1.8, 390/0.9, 528/247.2, 558/11.0, 562/154.3, 627/12.6, 628/48.3, 658/0.0, 660/1.4, 716/25.4, 718/42.2, 747/0.8, 795/23.3, 796/55.0, 844/2.2, 847/29.3, 853/2.9, 861/29.6, 894/2.9, 901/1.7, 901/14.0, 918/5.6, 920/8.6, 1022/10.7, 1026/0.2, 1026/0.2, 1031/3.4, 1039/45.5, 1043/111.3, 1071/20.4, 1072/4.3, 1112/4.2, 1116/11.0, 1154/10.1, 1155/2.4, 1235/2.7, 1237/4.9, 1294/23.2, 1294/45.9, 1331/9.1, 1332/12.1, 1348/64.1, 1348/140.5, 1362/9.5, 1409/35.3, 1410/9.3, 1420/4.1, 1433/17.6, 1476/23.7, 1478/44.1, 1529/20.6, 1530/17.8, 1583/130.2, 1590/577.7, 2267/24.3, 2927/90.6, 2928/144.5, 2933/30.8, 3010/18.2, 3027/1.2, 3168/2.2, 3168/2.9, 3176/79.5, 3181/15.7, 3188/2.4, 3188/1.9, 3539/19.8, 3539/149.6

### QCH<sub>3</sub>CN-TS1

i1278/291.9, 15/0.1, 16/1.3, 26/0.7, 37/1.5, 38/0.8, 39/2.1, 43/0.0, 51/10.4, 62/4.8, 72/1.7, 73/7.9, 74/2.6, 81/0.0, 84/1.5, 86/0.0, 110/10.5, 125/6.4, 138/1.0, 138/3.5, 167/7.7, 169/3.6, 185/0.1, 188/1.4, 196/23.9, 207/5.5, 210/21.4, 259/7.3, 294/37.5, 302/33.2, 313/30.0, 321/120.7, 345/39.2, 363/17.6, 381/20.9, 437/6.9, 444/7.9, 518/215.7, 552/28.0, 556/135.6, 626/8.4, 627/43.2, 636/1.0, 657/0.0, 659/1.6, 719/11.1, 720/53.6, 791/28.9, 792/55.0, 826/1.3, 836/35.4, 860/1.2, 860/12.9, 899/0.5, 899/14.7, 913/26.2, 918/4.7, 919/5.6, 943/2.8, 1003/22.7, 1027/0.3, 1027/0.3, 1042/37.7, 1044/99.8, 1073/21.4, 1074/9.0, 1113/4.7, 1116/7.0, 1133/46.5, 1151/12.7, 1152/2.3, 1236/0.5, 1237/0.7, 1292/72.9, 1297/11.6, 1297/41.8, 1329/5.3, 1330/16.7, 1348/88.4, 1349/121.7, 1398/5.3, 1409/26.7, 1409/10.6, 1478/20.1, 1479/53.7, 1530/17.6, 1531/18.9, 1586/105.5, 1591/551.7, 2223/34.3, 2921/105.6, 2921/153.6, 3001/1.1, 3080/0.3, 3170/0.3, 3170/8.4, 3175/43.9, 3179/12.1, 3189/0.9, 3189/3.0, 3538/0.8, 3538/161.7

### QCH<sub>3</sub>CN-TS2

i262/68.0, 14/0.1, 15/0.9, 35/2.8, 38/2.8, 47/0.6, 51/0.5, 57/1.3, 59/0.2, 66/0.1, 71/3.1, 73/5.9, 89/15.7, 96/1.1, 101/0.1, 105/7.8, 111/1.4, 124/3.8, 139/2.3, 149/23.7, 164/3.4, 165/10.1, 175/1.2, 185/0.0, 198/2.2, 200/3.4, 212/22.1, 241/12.2, 279/34.5, 298/37.7,

303/52.3, 312/76.4, 313/71.9, 385/2.5, 438/9.7, 480/3.1, 512/0.5, 551/37.8, 555/110.0, 562/149.9, 627/12.9, 627/36.6, 657/1.3, 659/1.8, 667/185.1, 720/21.2, 721/46.1, 737/56.1, 787/38.1, 788/51.6, 823/2.1, 836/3.3, 850/29.8, 867/4.9, 867/13.1, 898/1.2, 898/14.7, 917/5.1, 918/8.3, 1013/0.4, 1016/11.7, 1028/0.2, 1028/0.3, 1050/39.8, 1051/105.6, 1077/14.5, 1078/16.2, 1118/6.1, 1120/11.6, 1149/4.6, 1150/3.4, 1252/0.4, 1253/1.9, 1300/12.4, 1300/51.9, 1324/4.8, 1325/15.6, 1349/112.6, 1350/113.4, 1402/6.1, 1410/22.2, 1411/16.5, 1484/18.7, 1485/46.6, 1533/16.1, 1533/17.3, 1590/88.2, 1593/508.8, 2139/169.7, 2913/139.2, 2914/147.9, 3069/3.5, 3150/84.5, 3153/34.5, 3170/2.1, 3171/5.5, 3171/13.7, 3189/0.3, 3189/5.4, 3538/8.5, 3538/153.1, 3625/53.7

#### **PCH<sub>2</sub>CNOH**

12/1.3, 15/1.6, 22/3.9, 36/2.4, 41/7.9, 48/0.8, 54/0.5, 55/1.4, 62/1.7, 72/0.8, 77/2.0, 86/2.8, 96/2.2, 102/4.4, 110/1.0, 117/23.0, 127/2.5, 134/8.9, 138/0.8, 150/2.0, 154/22.0, 167/26.4, 176/4.0, 185/4.7, 193/11.2, 204/29.1, 242/5.1, 259/21.2, 293/58.8, 301/43.2, 305/55.1, 324/55.0, 357/0.8, 445/100.1, 544/85.5, 560/78.9, 574/1.2, 624/27.0, 626/29.9, 657/4.1, 661/0.3, 711/26.9, 713/101.5, 715/24.5, 732/357.8, 781/43.7, 782/31.5, 817/23.2, 829/8.2, 854/10.1, 877/20.8, 896/11.1, 899/22.0, 903/11.2, 911/10.1, 917/2.7, 973/5.1, 1026/0.2, 1029/1.3, 1031/231.5, 1034/14.3, 1045/72.8, 1070/9.5, 1074/19.8, 1114/27.5, 1117/11.4, 1147/4.7, 1149/5.1, 1222/39.8, 1238/2.1, 1241/22.7, 1301/55.7, 1303/51.7, 1328/9.3, 1329/9.2, 1346/133.2, 1349/58.1, 1353/45.8, 1407/26.9, 1409/14.1, 1411/22.9, 1443/4.6, 1463/21.0, 1476/38.1, 1523/11.9, 1529/18.3, 1585/488.2, 1604/390.4, 2273/1.6, 2894/166.4, 2929/100.6, 2943/29.9, 3004/20.4, 3080/142.6, 3162/2.6, 3171/4.7, 3183/8.3, 3184/0.8, 3189/4.9, 3305/1061.1, 3539/83.7, 3539/81.5

#### **QCH<sub>3</sub>NO<sub>2</sub>**

13/0.1, 18/2.1, 24/0.2, 26/0.9, 33/0.9, 36/4.9, 37/2.5, 45/1.9, 50/0.3, 55/0.4, 61/2.5, 62/5.4, 71/1.6, 73/0.7, 87/3.8, 92/6.5, 110/6.8, 123/8.6, 134/3.9, 137/4.1, 152/29.4, 158/5.4, 168/8.3, 192/6.3, 194/0.1, 197/4.7, 215/9.4, 217/10.8, 238/21.0, 271/16.1, 310/36.3, 316/15.1, 326/94.1, 345/64.8, 366/71.0, 461/1.7, 528/228.8, 550/54.5, 558/117.5, 596/3.8, 623/18.6, 627/31.1, 639/20.7, 658/0.1, 659/2.9, 716/28.5, 717/39.4, 750/0.9, 795/25.3, 796/53.0, 845/0.4, 846/36.5, 853/0.6, 862/21.2, 898/8.6, 901/3.7, 902/12.9, 919/7.5, 920/8.2, 1026/0.3, 1026/0.2, 1039/63.3, 1046/90.8, 1072/14.8, 1073/8.7, 1081/14.5, 1107/5.2, 1113/6.0, 1119/13.1, 1154/8.0, 1155/3.7, 1235/4.1, 1244/4.2, 1293/25.6, 1294/43.2, 1331/10.2, 1332/9.7, 1348/63.7, 1348/145.2, 1365/27.4, 1396/63.8, 1409/32.3, 1411/7.9, 1425/47.6, 1427/8.0, 1479/23.3, 1480/44.7, 1530/21.0, 1531/21.4, 1582/131.2, 1589/490.9, 1594/363.6, 2927/129.7, 2928/62.8, 2929/124.7, 3047/18.5, 3103/1.1, 3165/87.1, 3168/2.8, 3168/6.9, 3178/18.3, 3188/1.0, 3189/1.2, 3540/74.0, 3542/94.7

#### **QCH<sub>3</sub>NO<sub>2</sub>-TS1**

i1199/130.5, 13/0.0, 16/2.4, 29/0.0, 36/0.1, 39/0.9, 40/1.1, 40/0.4, 41/6.1, 59/1.4, 64/2.5, 68/4.4, 80/0.8, 83/0.1, 84/0.4, 89/1.1, 110/16.7, 113/3.6, 125/4.7, 139/2.7, 140/3.7, 168/3.3, 169/7.2, 186/14.0, 191/0.0, 203/28.9, 211/23.8, 212/5.2, 271/13.0, 302/43.1, 305/32.3, 313/28.7, 322/100.0, 345/75.9, 379/20.4, 447/0.2, 495/5.2, 519/196.3, 520/1.0, 554/23.1, 556/131.3, 626/11.1, 627/46.4, 652/26.9, 656/0.9, 657/0.6, 716/29.2, 717/17.9, 719/30.0, 792/22.5, 792/62.1, 825/1.1, 831/36.5, 852/1.3, 852/12.8, 900/0.8, 900/11.5, 920/7.5, 920/8.0, 930/3.9, 979/34.0, 1019/12.8, 1027/0.3, 1027/0.2, 1047/58.4, 1048/86.9, 1075/13.5, 1076/10.6, 1111/97.9, 1118/0.5, 1119/9.5, 1153/9.3, 1153/2.3, 1246/0.6, 1247/1.3, 1297/12.2, 1297/55.1, 1329/3.9, 1329/6.2, 1348/72.6, 1348/218.1, 1358/241.6, 1388/76.9, 1398/16.2, 1411/36.3, 1411/8.8, 1483/23.9, 1484/49.8, 1532/49.8, 1533/28.6, 1548/292.2, 1585/114.2, 1590/521.7, 2922/82.5, 2923/169.1, 3036/1.3, 3151/0.3, 3170/0.2, 3170/7.1, 3172/66.8, 3174/19.7, 3189/1.1, 3189/2.2, 3539/9.9, 3539/159.5

#### **QCH<sub>3</sub>NO<sub>2</sub>-TS2**

i292/340.6, 15/1.9, 25/2.4, 28/2.7, 39/0.6, 47/0.5, 51/1.2, 62/2.3, 68/2.0, 77/1.1, 78/5.3, 84/1.2, 97/3.1, 107/0.7, 109/0.9, 116/5.3, 135/11.5, 140/10.9, 152/16.4, 163/19.7, 168/1.8, 185/9.8, 186/1.7, 196/2.8, 207/3.5, 214/33.6, 228/28.6, 253/0.0, 258/16.2, 309/82.5, 317/3.5, 326/120.6, 349/14.0, 385/47.3, 403/106.7, 522/1.6, 547/114.4, 557/93.2, 565/67.4, 625/28.2, 630/30.1, 638/5.7, 657/0.4, 659/0.1, 676/3.9, 715/36.1, 721/35.0, 729/3.5, 739/68.1, 757/130.2, 795/40.9, 833/9.4, 856/8.0, 864/12.6, 873/5.5, 901/9.9, 901/3.9, 918/7.0, 919/15.6, 971/45.9, 997/227.3, 1028/2.2, 1028/4.5, 1044/94.3, 1054/69.4, 1057/78.7, 1077/4.2, 1077/18.2, 1118/23.7, 1123/6.1, 1153/5.2, 1156/3.5, 1189/23.4, 1243/21.8, 1264/2.6, 1295/32.6, 1312/181.4, 1323/60.1, 1324/128.8, 1331/11.2, 1348/108.7, 1359/24.3, 1402/167.3, 1411/17.5, 1412/8.3, 1468/246.9, 1476/70.2, 1490/45.8, 1530/13.6, 1535/26.4, 1586/299.2, 1617/476.9

2862/1353.0, 2892/138.0, 2931/126.4, 3077/199.5, 3097/10.5, 3165/6.5, 3167/35.8, 3170/6.5, 3188/0.3, 3189/1.2, 3229/4.0, 3538/75.7, 3540/99.2

#### **PCH<sub>2</sub>NO<sub>2</sub>OH**

15/1.7, 18/0.4, 31/1.0, 39/1.1, 43/5.6, 48/0.9, 55/0.9, 60/0.3, 64/1.0, 68/0.4, 75/1.0, 78/5.0, 85/7.8, 92/1.2, 97/2.4, 108/1.4, 113/7.6, 131/14.5, 135/5.1, 139/5.6, 156/11.9, 160/19.7, 169/21.2, 178/3.1, 185/4.1, 197/10.2, 205/28.3, 247/12.3, 290/58.0, 299/28.0, 307/50.3, 310/18.3, 326/68.5, 445/102.2, 486/12.6, 548/86.2, 556/7.3, 559/79.6, 624/27.3, 626/32.6, 658/6.2, 661/0.3, 667/44.0, 711/38.0, 714/26.9, 727/200.0, 757/284.6, 782/58.3, 784/30.3, 829/8.1, 842/33.0, 850/4.6, 853/5.9, 898/5.7, 899/18.6, 901/16.5, 911/9.5, 917/3.7, 1026/0.5, 1027/6.4, 1030/6.9, 1035/112.8, 1047/74.8, 1070/8.6, 1074/13.4, 1115/32.9, 1119/14.3, 1148/9.6, 1150/4.5, 1152/146.8, 1224/61.4, 1241/22.1, 1249/4.1, 1299/58.5, 1302/45.3, 1324/31.1, 1329/9.5, 1329/12.6, 1349/138.1, 1349/80.0, 1386/97.2, 1407/25.5, 1409/19.5, 1425/27.4, 1448/0.9, 1464/21.2, 1479/35.2, 1524/12.3, 1530/20.4, 1584/446.1, 1600/371.2, 1620/308.7, 2900/157.5, 2932/99.4, 2974/30.4, 3052/14.9, 3085/135.3, 3163/2.7, 3166/56.6, 3170/4.7, 3185/0.8, 3188/2.3, 3279/1078.0, 3539/94.6, 3539/72.1

#### **QCH<sub>3</sub>F**

16/0.0, 20/1.1, 26/4.5, 31/0.4, 38/0.9, 43/0.9, 46/0.2, 53/0.0, 63/0.7, 64/0.9, 66/3.4, 75/0.0, 79/1.8, 87/3.7, 99/6.1, 103/13.9, 115/4.7, 128/2.0, 135/12.9, 136/0.5, 147/19.4, 163/8.8, 169/5.0, 188/0.0, 192/4.4, 212/9.7, 214/12.8, 240/25.0, 268/12.2, 310/38.9, 316/22.2, 324/96.3, 361/43.9, 366/76.3, 525/257.8, 549/16.1, 553/153.8, 625/5.0, 626/41.1, 660/0.0, 662/2.8, 717/8.6, 717/58.8, 745/0.7, 794/18.9, 795/60.4, 854/2.1, 854/20.7, 874/0.1, 888/44.3, 902/0.1, 903/18.8, 918/7.4, 919/10.1, 983/75.2, 1026/0.3, 1026/0.2, 1042/42.7, 1045/111.1, 1071/18.5, 1072/5.7, 1115/4.9, 1119/16.8, 1146/0.8, 1150/0.6, 1153/8.8, 1154/1.2, 1240/1.0, 1242/5.9, 1294/14.5, 1295/54.6, 1331/6.9, 1332/18.2, 1348/64.0, 1348/138.1, 1408/35.8, 1409/8.3, 1435/0.5, 1446/3.1, 1455/6.3, 1477/16.5, 1478/52.3, 1530/20.6, 1531/21.9, 1585/124.1, 1591/588.1, 2924/72.9, 2925/168.0, 2938/42.1, 3021/39.7, 3048/1.3, 3165/110.9, 3168/6.8, 3168/7.6, 3171/23.2, 3188/1.4, 3188/1.3, 3540/6.8, 3541/150.8

#### **QCH<sub>3</sub>F-TS1**

i914/245.1, 12/0.0, 16/0.7, 22/0.0, 38/6.7, 40/0.2, 43/0.8, 54/0.0, 58/0.1, 63/0.1, 67/0.0, 74/0.4, 80/10.3, 87/0.4, 90/0.8, 107/4.5, 122/7.9, 124/5.7, 136/0.1, 147/14.7, 166/10.0, 182/14.6, 183/0.1, 190/12.3, 200/3.5, 202/25.7, 226/10.8, 288/50.7, 292/2.6, 301/32.9, 313/65.9, 316/108.3, 341/2.2, 423/20.1, 435/76.9, 541/40.7, 545/118.7, 593/44.0, 619/218.3, 625/2.3, 625/35.3, 658/0.0, 660/2.5, 717/14.5, 717/53.3, 789/30.5, 789/54.3, 824/52.9, 841/12.0, 852/39.0, 858/0.3, 860/3.2, 898/1.2, 898/17.7, 917/5.8, 918/11.2, 1013/336.3, 1027/0.2, 1027/1.4, 1044/38.9, 1046/111.0, 1071/17.6, 1072/7.3, 1092/41.5, 1116/6.1, 1119/16.4, 1149/7.2, 1150/2.2, 1176/12.7, 1243/2.2, 1245/2.3, 1300/12.1, 1300/51.4, 1331/4.0, 1331/15.8, 1348/98.5, 1349/112.5, 1407/24.2, 1408/10.4, 1430/1.4, 1478/17.0, 1479/52.3, 1530/14.7, 1531/21.4, 1590/102.7, 1594/525.6, 2503/25.1, 2910/130.1, 2910/154.6, 2970/9.3, 3090/13.0, 3169/0.2, 3169/8.3, 3174/42.8, 3177/12.4, 3188/0.9, 3188/3.8, 3540/0.9, 3541/146.6

#### **PCH<sub>2</sub>FOH**

13/2.3, 21/0.6, 23/1.5, 27/1.7, 40/0.5, 45/0.3, 52/2.1, 55/0.4, 60/0.1, 69/0.4, 72/1.3, 79/1.6, 88/0.9, 98/3.8, 106/6.3, 113/4.6, 117/13.4, 132/21.2, 140/3.1, 150/30.6, 160/8.8, 175/9.4, 187/5.5, 199/16.4, 202/8.6, 218/3.8, 235/24.6, 289/15.7, 309/80.5, 312/25.9, 316/98.4, 435/95.3, 518/9.9, 560/78.9, 603/11.4, 624/29.0, 654/32.9, 660/0.1, 711/38.6, 718/6.9, 738/43.7, 748/370.7, 793/19.6, 794/34.4, 827/7.1, 834/18.8, 846/2.4, 882/96.1, 894/11.6, 900/18.8, 908/2.3, 911/9.2, 920/8.5, 970/206.9, 1026/0.2, 1026/0.2, 1034/125.2, 1051/47.2, 1071/9.0, 1075/34.9, 1084/6.4, 1115/21.2, 1123/147.2, 1132/49.9, 1150/4.6, 1164/10.1, 1233/5.0, 1240/24.1, 1242/4.9, 1296/33.1, 1300/60.9, 1327/16.0, 1329/10.6, 1348/111.9, 1353/84.9, 1401/22.6, 1408/25.4, 1421/23.7, 1465/23.3, 1473/24.9, 1483/12.6, 1490/40.5, 1524/9.3, 1525/34.1, 1589/324.5, 1594/520.7, 2918/146.4, 2931/80.0, 2934/94.2, 3002/81.5, 3096/124.7, 3162/2.9, 3165/1.2, 3185/0.8, 3185/0.5, 3200/11.1, 3207/1095.3, 3405/418.6, 3538/89.0



**Table S3:** Zero-point energies ( $ZPE$ ) (hartree), total energies ( $E_c$ ) (hartree) corrected by  $ZPE$ , and relative energies ( $E_r$ ) ( $\text{kJ mol}^{-1}$ ) for all the species in the reaction of  $Q + \text{CH}_3X$  ( $X = \text{H, CH}_3, \text{CN, NO}_2, \text{F}$ ) calculated at the B3LYP/6-31G(d, p), Lanl2dz level in the gas phase, and the B3LYP/6-311++G(d, p), Lanl2dz level and the B3LYP\*/cc-pVTZ, Lanl2tz level in the protein solution.

| Species                                             | B3LYP/6-31G(d, p), Lanl2dz |             |        | B3LYP/6-311++G(d, p), Lanl2dz |             |        | B3LYP*/cc-pVTZ, Lanl2tz |                   |        |
|-----------------------------------------------------|----------------------------|-------------|--------|-------------------------------|-------------|--------|-------------------------|-------------------|--------|
|                                                     | in the gas phase           |             |        | in the protein solution       |             |        | in the protein solution |                   |        |
|                                                     | $ZPE$                      | $E_c$       | $E_r$  | $ZPE$                         | $E_c$       | $E_r$  | $E_t$                   | $E_c (ZPE + E_t)$ | $E_r$  |
| Q                                                   | 0.20002                    | -1112.29721 |        | 0.19683                       | -1112.63069 |        | -1106.17717             | -1105.98034       |        |
| CH <sub>4</sub>                                     | 0.04503                    | -40.47899   |        | 0.04437                       | -40.48971   |        | -40.21031               | -40.16593         |        |
| Q + CH <sub>4</sub>                                 | 0.24505                    | -1152.77620 | 0.0    | 0.24120                       | -1153.12040 | 0.0    | -1146.38748             | -1146.14628       | 0.0    |
| QCH <sub>4</sub>                                    | 0.24566                    | -1152.77666 | -1.2   | 0.24264                       | -1153.11781 | 6.8    | -1146.38654             | -1146.14390       | 6.3    |
| QCH <sub>4</sub> -TS1                               | 0.24185                    | -1152.72349 | 138.4  | 0.23690                       | -1153.08139 | 102.4  | -1146.34306             | -1146.10617       | 105.3  |
| QH                                                  | 0.21015                    | -1112.94404 |        | 0.20686                       | -1113.28502 |        | -1106.81596             | -1106.60910       |        |
| CH <sub>3</sub>                                     | 0.02977                    | -39.81311   |        | 0.02949                       | -39.82633   |        | -39.54944               | -39.51995         |        |
| QH + CH <sub>3</sub>                                | 0.23992                    | -1152.75715 | 50.0   | 0.23635                       | -1153.11135 | 23.8   | -1146.36540             | -1146.12905       | 45.2   |
| QCH <sub>4</sub> -TS2,<br><S <sup>2</sup> >=0.751   | 0.24316                    | -1152.74894 | 71.6   | 0.24066                       | -1153.10108 | 50.7   | -1146.36550             | -1146.12484       | 56.3   |
| PCH <sub>3</sub> OH                                 | 0.25145                    | -1152.84495 | -180.5 | 0.24826                       | -1153.19482 | -195.4 | -1146.45982             | -1146.21155       | -171.4 |
| P                                                   | 0.19720                    | -1037.15379 |        | 0.19233                       | -1037.47529 |        | -1031.41577             | -1031.22343       |        |
| CH <sub>3</sub> OH                                  | 0.05141                    | -115.67256  |        | 0.04983                       | -115.72509  |        | -115.04119              | -114.99135        |        |
| P + CH <sub>3</sub> OH                              | 0.24860                    | -1152.82634 | -131.6 | 0.24217                       | -1153.20039 | -210.0 | -1146.45695             | -1146.21479       | -179.9 |
| Q                                                   | 0.20002                    | -1112.29721 |        | 0.19683                       | -1112.63069 |        | -1106.17717             | -1105.98034       |        |
| CH <sub>3</sub> CH <sub>3</sub>                     | 0.07493                    | -79.76381   |        | 0.07403                       | -79.78279   |        | -79.24190               | -79.16787         |        |
| Q + CH <sub>3</sub> CH <sub>3</sub>                 | 0.27495                    | -1192.06102 | 0.0    | 0.27086                       | -1192.41348 | 0.0    | -1185.41908             | -1185.14821       | 0.0    |
| QCH <sub>3</sub> CH <sub>3</sub>                    | 0.27544                    | -1192.06111 | -0.2   | 0.27196                       | -1192.41085 | 6.9    | -1185.41777             | -1185.14581       | 6.3    |
| QCH <sub>3</sub> CH <sub>3</sub> -TS1               | 0.27075                    | -1192.01692 | 115.8  | 0.26593                       | -1192.38460 | 75.8   | -1185.38346             | -1185.11753       | 80.5   |
| QH                                                  | 0.21015                    | -1112.94404 |        | 0.20686                       | -1113.28502 |        | -1106.81596             | -1106.60910       |        |
| CH <sub>3</sub> CH <sub>2</sub>                     | 0.05944                    | -79.10577   |        | 0.05873                       | -79.12721   |        | -78.58879               | -78.53007         |        |
| QH + CH <sub>3</sub> CH <sub>2</sub>                | 0.26959                    | -1192.04980 | 29.4   | 0.26559                       | -1192.41224 | 3.3    | -1185.40475             | -1185.13917       | 23.7   |
| QCH <sub>3</sub> CH <sub>3</sub> -TS2               | 0.27330                    | -1192.02398 | 97.2   | 0.26946                       | -1192.40376 | 25.5   | -1185.40634             | -1185.13688       | 29.7   |
| PCH <sub>3</sub> CH <sub>2</sub> OH                 | 0.27990                    | -1192.13827 | -202.8 | 0.27627                       | -1192.49661 | -218.3 | -1185.49882             | -1185.22255       | -195.2 |
| P                                                   | 0.19720                    | -1037.15379 |        | 0.19233                       | -1037.47529 |        | -1031.41577             | -1031.22343       |        |
| CH <sub>3</sub> CH <sub>2</sub> OH                  | 0.08014                    | -154.96607  |        | 0.07823                       | -155.02722  |        | -154.08092              | -154.00269        |        |
| P + CH <sub>3</sub> CH <sub>2</sub> OH              | 0.27733                    | -1192.11985 | -154.5 | 0.27056                       | -1192.50251 | -233.8 | -1185.49668             | -1185.22613       | -204.6 |
| Q                                                   | 0.20002                    | -1112.29721 |        | 0.19683                       | -1112.63069 |        | -1106.17717             | -1105.98034       |        |
| CH <sub>3</sub> CN                                  | 0.04542                    | -132.71373  |        | 0.04486                       | -132.76026  |        | -131.91940              | -131.87455        |        |
| Q + CH <sub>3</sub> CN                              | 0.24544                    | -1245.01094 | 0.0    | 0.24169                       | -1245.39095 | 0.0    | -1238.09658             | -1237.85489       | 0.0    |
| QCH <sub>3</sub> CN                                 | 0.24661                    | -1245.02216 | -29.5  | 0.24412                       | -1245.39101 | -0.1   | -1238.09851             | -1237.85439       | 1.3    |
| QCH <sub>3</sub> CN-TS1,<br><S <sup>2</sup> >=0.605 | 0.23939                    | -1244.99042 | 53.9   | 0.23633                       | -1245.36270 | 74.2   | -1238.06160             | -1237.82527       | 77.8   |
| QH                                                  | 0.21015                    | -1112.94404 |        | 0.20686                       | -1113.28502 |        | -1106.81596             | -1106.60910       |        |
| CH <sub>2</sub> CN                                  | 0.03114                    | -132.06663  |        | 0.03075                       | -132.11217  |        | -131.27572              | -131.24497        |        |
| QH + CH <sub>2</sub> CN                             | 0.24129                    | -1245.01067 | 0.7    | 0.23760                       | -1245.39720 | -16.4  | -1238.09168             | -1237.85408       | 2.1    |

|                                                                   |         |             |        |         |             |        |             |             |        |
|-------------------------------------------------------------------|---------|-------------|--------|---------|-------------|--------|-------------|-------------|--------|
| QCH <sub>3</sub> CN-TS2,<br><S <sup>2</sup> >=0.703               | 0.24493 | -1245.01134 | -1.0   | 0.24192 | -1245.38979 | 3.0    | -1238.09420 | -1237.85228 | 6.9    |
| PCH <sub>2</sub> CNOH                                             | 0.25032 | -1245.08121 | -184.5 | 0.24703 | -1245.46244 | -187.7 | -1238.16513 | -1237.91810 | -166.0 |
| P                                                                 | 0.19720 | -1037.15379 |        | 0.19233 | -1037.47529 |        | -1031.41577 | -1031.22343 |        |
| CH <sub>2</sub> CNOH                                              | 0.05038 | -207.90546  |        | 0.04888 | -207.99363  |        | -206.74861  | -206.69972  |        |
| P + CH <sub>2</sub> CNOH                                          | 0.24758 | -1245.05925 | -126.8 | 0.24121 | -1245.46892 | -204.7 | -1238.16437 | -1237.92316 | -179.2 |
| Q                                                                 | 0.20002 | -1112.29721 |        | 0.19683 | -1112.63069 |        | -1106.17717 | -1105.98034 |        |
| CH <sub>3</sub> NO <sub>2</sub>                                   | 0.05001 | -244.96337  |        | 0.04934 | -245.05147  |        | -243.66202  | -243.61268  |        |
| Q + CH <sub>3</sub> NO <sub>2</sub>                               | 0.25003 | -1357.26058 | 0.0    | 0.24617 | -1357.68217 | 0.0    | -1349.83920 | -1349.59303 | 0.0    |
| QCH <sub>3</sub> NO <sub>2</sub>                                  | 0.25147 | -1357.27273 | -31.9  | 0.24794 | -1357.68492 | -7.2   | -1349.84371 | -1349.59577 | -7.2   |
| QCH <sub>3</sub> NO <sub>2</sub> -TS1,<br><S <sup>2</sup> >=0.605 | 0.24425 | -1357.24042 | 52.9   | 0.24066 | -1357.65529 | 70.6   | -1349.80587 | -1349.56521 | 73.0   |
| QH                                                                | 0.21015 | -1112.94404 |        | 0.20686 | -1113.28502 |        | -1106.81596 | -1106.60910 |        |
| CH <sub>2</sub> NO <sub>2</sub>                                   | 0.03520 | -244.30712  |        | 0.03492 | -244.39775  |        | -243.01197  | -242.97705  |        |
| QH + CH <sub>2</sub> NO <sub>2</sub>                              | 0.24535 | -1357.25115 | 24.7   | 0.24178 | -1357.68277 | -1.6   | -1349.82793 | -1349.58615 | 18.1   |
| QCH <sub>3</sub> NO <sub>2</sub> -TS2                             | 0.25079 | -1357.25413 | 16.9   | 0.24678 | -1357.66952 | 33.2   | -1349.82596 | -1349.57918 | 36.4   |
| PCH <sub>2</sub> NO <sub>2</sub> OH                               | 0.25493 | -1357.34510 | -221.9 | 0.25097 | -1357.76986 | -230.2 | -1349.92383 | -1349.67286 | -209.6 |
| P                                                                 | 0.19720 | -1037.15379 |        | 0.19233 | -1037.47529 |        | -1031.41577 | -1031.22343 |        |
| CH <sub>2</sub> NO <sub>2</sub> OH                                | 0.05519 | -320.17345  |        | 0.05320 | -320.29587  |        | -318.50341  | -318.45021  |        |
| P + CH <sub>2</sub> NO <sub>2</sub> OH                            | 0.25238 | -1357.32724 | -175.0 | 0.24553 | -1357.77116 | -233.6 | -1349.91917 | -1349.67365 | -211.7 |
| Q                                                                 | 0.20002 | -1112.29721 |        | 0.19683 | -1112.63069 |        | -1106.17717 | -1105.98034 |        |
| CH <sub>3</sub> F                                                 | 0.03933 | -139.69897  |        | 0.03889 | -139.75604  |        | -138.98983  | -138.95094  |        |
| Q + CH <sub>3</sub> F                                             | 0.23935 | -1251.99618 | 0.0    | 0.23572 | -1252.38673 | 0.0    | -1245.16700 | -1244.93129 | 0.0    |
| QCH <sub>3</sub> F                                                | 0.24090 | -1252.00701 | -28.4  | 0.23747 | -1252.38771 | -2.6   | -1245.17090 | -1244.93343 | -5.6   |
| QCH <sub>3</sub> F-TS1                                            | 0.23586 | -1251.95646 | 104.3  | 0.23124 | -1252.35330 | 87.8   | -1245.12953 | -1244.89829 | 86.6   |
| QH                                                                | 0.21015 | -1112.94404 |        | 0.20686 | -1113.28502 |        | -1106.81596 | -1106.60910 |        |
| CH <sub>2</sub> F                                                 | 0.02481 | -139.04283  |        | 0.02440 | -139.09815  |        | -138.33715  | -138.31274  |        |
| QH + CH <sub>2</sub> F                                            | 0.23496 | -1251.98687 | 24.4   | 0.23126 | -1252.38317 | 9.3    | -1245.15311 | -1244.92185 | 24.8   |
| PCH <sub>2</sub> FOH                                              | 0.24501 | -1252.09722 | -265.3 | 0.24132 | -1252.48395 | -255.3 | -1245.26345 | -1245.02212 | -238.5 |
| P                                                                 | 0.19720 | -1037.15379 |        | 0.19233 | -1037.47529 |        | -1031.41577 | -1031.22343 |        |
| CH <sub>2</sub> FOH                                               | 0.04515 | -214.91858  |        | 0.04319 | -215.01532  |        | -213.84557  | -213.80238  |        |
| P + CH <sub>2</sub> FOH                                           | 0.24234 | -1252.07237 | -200.0 | 0.23552 | -1252.49061 | -272.7 | -1245.26134 | -1245.02581 | -248.2 |

**Figure S1:** Arrhenius plots of rate constants in the reaction of  $Q + CH_3X$  ( $X = H, CH_3, CN, NO_2, F$ ) calculated at the B3LYP\*/cc-pVTZ, Lan12tz level in the protein solution

Reaction step of  $Q + CH_4 \rightarrow QCH_4-TS1 \rightarrow P + CH_3OH$  ( $k_1$ ):

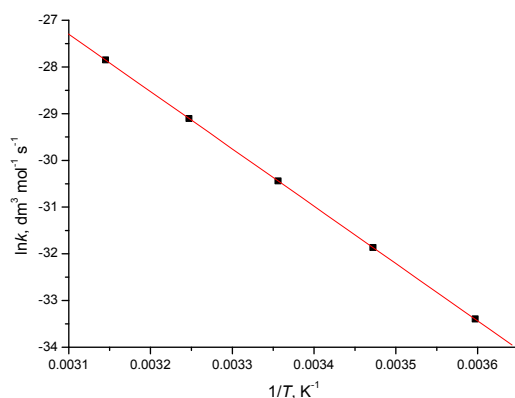

Reaction step of  $Q + CH_3CH_3 \rightarrow QCH_3CH_3-TS1 \rightarrow P + CH_3CH_2OH$  ( $k_2$ ):

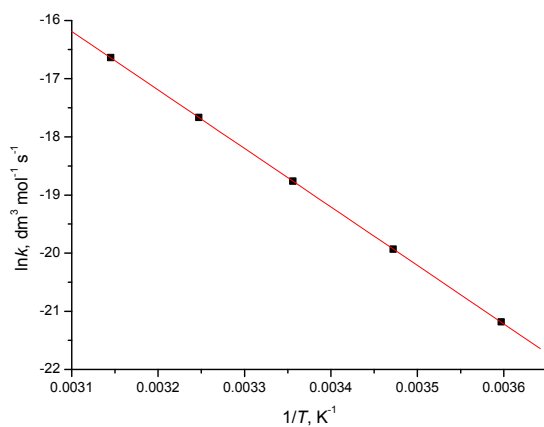

Reaction step of  $Q + CH_3CN \rightarrow QCH_3CN-TS1 \rightarrow P + CH_2CNOH$  ( $k_3$ ):

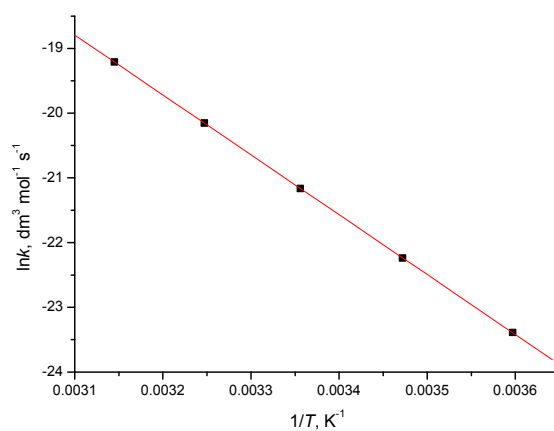

Reaction step of  $Q + \text{CH}_3\text{NO}_2 \rightarrow \text{QCH}_3\text{NO}_2\text{-TS1} \rightarrow \text{P} + \text{CH}_2\text{NO}_2\text{OH}$  ( $k_4$ ):

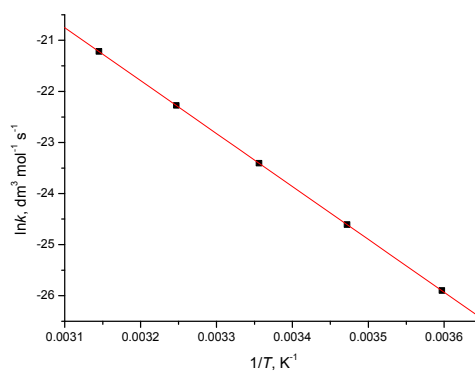

Reaction step of  $Q + \text{CH}_3\text{F} \rightarrow \text{QCH}_3\text{F-TS1} \rightarrow \text{P} + \text{CH}_2\text{FOH}$  ( $k_5$ ):

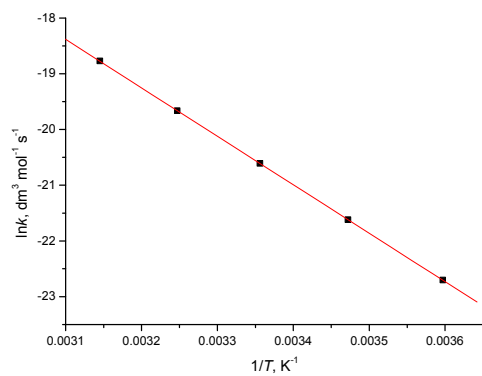

Supplement: c2ob25163a.pdf [file c2ob25163a.pdf]
